# Supplementary material for: Selection of suitable wheat genotypes under thermal stress and complex genotype-environment interaction using stability analyses and selection indices
Source: PeerJ. 2025 Sep 25;13:e20061. doi: 10.7717/peerj.20061 (PMC12476864; doi:10.7717/peerj.20061)
Supplement: Supplemental Information 2 [file peerj-13-20061-s002.xlsx]

## Sheet: GY
Season	Tretment	Environment	Genotype	Replicate	Gain Yield
S1	C	E1	G01	1	3.29175
S1	C	E1	G02	1	4.57188
S1	C	E1	G03	1	4.46738
S1	C	E1	G04	1	7.04
S1	C	E1	G05	1	5.61972
S1	C	E1	G06	1	5.50248
S1	C	E1	G07	1	4.53145
S1	C	E1	G08	1	4.85925
S1	C	E1	G09	1	5.17275
S1	C	E1	G10	1	5.27725
S1	C	E1	G11	1	4.18
S1	C	E1	G12	1	5.38478
S1	C	E1	G13	1	5.32593
S1	C	E1	G14	1	5.14937
S1	C	E1	G15	1	6.29612
S1	C	E1	G16	1	4.75475
S1	C	E1	G17	1	4.03123
S1	C	E1	G18	1	6.09098
S1	C	E1	G19	1	6.71413
S1	C	E1	G20	1	4.75341
S1	H	E2	G01	1	3.07757
S1	H	E2	G02	1	4.24966
S1	H	E2	G03	1	3.84534
S1	H	E2	G04	1	6.48928
S1	H	E2	G05	1	4.69542
S1	H	E2	G06	1	4.66302
S1	H	E2	G07	1	4.21012
S1	H	E2	G08	1	4.8
S1	H	E2	G09	1	4.86571
S1	H	E2	G10	1	4.94296
S1	H	E2	G11	1	3.58403
S1	H	E2	G12	1	4.42424
S1	H	E2	G13	1	4.17461
S1	H	E2	G14	1	3.60251
S1	H	E2	G15	1	4.49934
S1	H	E2	G16	1	3.80083
S1	H	E2	G17	1	3.07926
S1	H	E2	G18	1	6.01253
S1	H	E2	G19	1	5.82516
S1	H	E2	G20	1	4.47901
S1	C	E1	G01	2	3.465
S1	C	E1	G02	2	4.8125
S1	C	E1	G03	2	4.7025
S1	C	E1	G04	2	7.04
S1	C	E1	G05	2	5.3175
S1	C	E1	G06	2	5.1425
S1	C	E1	G07	2	4.235
S1	C	E1	G08	2	5.115
S1	C	E1	G09	2	5.445
S1	C	E1	G10	2	5.555
S1	C	E1	G11	2	4.4
S1	C	E1	G12	2	5.0325
S1	C	E1	G13	2	4.9775
S1	C	E1	G14	2	4.8125
S1	C	E1	G15	2	6.6275
S1	C	E1	G16	2	5.005
S1	C	E1	G17	2	3.7675
S1	C	E1	G18	2	6.6925
S1	C	E1	G19	2	7.0675
S1	C	E1	G20	2	4.86675
S1	H	E2	G01	2	3.27308
S1	H	E2	G02	2	4.47304
S1	H	E2	G03	2	3.83751
S1	H	E2	G04	2	6.14601
S1	H	E2	G05	2	5.18245
S1	H	E2	G06	2	4.45757
S1	H	E2	G07	2	4.08969
S1	H	E2	G08	2	4.98906
S1	H	E2	G09	2	5.24859
S1	H	E2	G10	2	5.06977
S1	H	E2	G11	2	3.73603
S1	H	E2	G12	2	4.56414
S1	H	E2	G13	2	3.89779
S1	H	E2	G14	2	3.56357
S1	H	E2	G15	2	4.84923
S1	H	E2	G16	2	4.09459
S1	H	E2	G17	2	3.20794
S1	H	E2	G18	2	6.45791
S1	H	E2	G19	2	6.1968
S1	H	E2	G20	2	4.57018
S1	C	E1	G01	3	3.70755
S1	C	E1	G02	3	5.14937
S1	C	E1	G03	3	5.03167
S1	C	E1	G04	3	7.04
S1	C	E1	G05	3	5.10163
S1	C	E1	G06	3	4.88537
S1	C	E1	G07	3	4.02325
S1	C	E1	G08	3	5.47305
S1	C	E1	G09	3	5.82615
S1	C	E1	G10	3	5.94385
S1	C	E1	G11	3	4.708
S1	C	E1	G12	3	4.78087
S1	C	E1	G13	3	4.72863
S1	C	E1	G14	3	4.57188
S1	C	E1	G15	3	7.09142
S1	C	E1	G16	3	5.35535
S1	C	E1	G17	3	3.57912
S1	C	E1	G18	3	6.40787
S1	C	E1	G19	3	7.04
S1	C	E1	G20	3	4.88542
S1	H	E2	G01	3	3.33605
S1	H	E2	G02	3	4.35006
S1	H	E2	G03	3	3.97273
S1	H	E2	G04	3	6.26013
S1	H	E2	G05	3	5.01528
S1	H	E2	G06	3	4.50298
S1	H	E2	G07	3	3.93322
S1	H	E2	G08	3	5.03209
S1	H	E2	G09	3	5.42699
S1	H	E2	G10	3	5.21188
S1	H	E2	G11	3	3.78898
S1	H	E2	G12	3	4.22204
S1	H	E2	G13	3	4.08793
S1	H	E2	G14	3	3.44073
S1	H	E2	G15	3	5.12426
S1	H	E2	G16	3	4.05638
S1	H	E2	G17	3	3.19787
S1	H	E2	G18	3	6.04996
S1	H	E2	G19	3	6.1035
S1	H	E2	G20	3	4.77288
S2	C	E3	G01	1	3.75627
S2	C	E3	G02	1	5.54577
S2	C	E3	G03	1	4.3101
S2	C	E3	G04	1	7.04
S2	C	E3	G05	1	5.18833
S2	C	E3	G06	1	6.05329
S2	C	E3	G07	1	4.81708
S2	C	E3	G08	1	6.14088
S2	C	E3	G09	1	5.8651
S2	C	E3	G10	1	5.17725
S2	C	E3	G11	1	3.86946
S2	C	E3	G12	1	5.40106
S2	C	E3	G13	1	5.44219
S2	C	E3	G14	1	3.91077
S2	C	E3	G15	1	5.85556
S2	C	E3	G16	1	4.37652
S2	C	E3	G17	1	3.4949
S2	C	E3	G18	1	7.04
S2	C	E3	G19	1	7.04
S2	C	E3	G20	1	5.29146
S2	H	E4	G01	1	2.67846
S2	H	E4	G02	1	3.31712
S2	H	E4	G03	1	3.42865
S2	H	E4	G04	1	4.38481
S2	H	E4	G05	1	4.12115
S2	H	E4	G06	1	3.25865
S2	H	E4	G07	1	3.96154
S2	H	E4	G08	1	4.79942
S2	H	E4	G09	1	4.33519
S2	H	E4	G10	1	5.16596
S2	H	E4	G11	1	3.32962
S2	H	E4	G12	1	3.29462
S2	H	E4	G13	1	2.55462
S2	H	E4	G14	1	2.51981
S2	H	E4	G15	1	2.29077
S2	H	E4	G16	1	2.98442
S2	H	E4	G17	1	2.31635
S2	H	E4	G18	1	5.46731
S2	H	E4	G19	1	4.23715
S2	H	E4	G20	1	4.8
S2	C	E3	G01	2	4.0616
S2	C	E3	G02	2	5.84554
S2	C	E3	G03	2	3.91531
S2	C	E3	G04	2	6.82149
S2	C	E3	G05	2	6.70027
S2	C	E3	G06	2	5.58
S2	C	E3	G07	2	4.583
S2	C	E3	G08	2	5.66883
S2	C	E3	G09	2	6.64577
S2	C	E3	G10	2	5.15887
S2	C	E3	G11	2	4.03358
S2	C	E3	G12	2	6.01638
S2	C	E3	G13	2	4.8274
S2	C	E3	G14	2	3.95429
S2	C	E3	G15	2	6.509
S2	C	E3	G16	2	4.89587
S2	C	E3	G17	2	3.98929
S2	C	E3	G18	2	7.04
S2	C	E3	G19	2	7.04
S2	C	E3	G20	2	5.36702
S2	H	E4	G01	2	2.81238
S2	H	E4	G02	2	3.48297
S2	H	E4	G03	2	3.60009
S2	H	E4	G04	2	4.60405
S2	H	E4	G05	2	4.32721
S2	H	E4	G06	2	3.42159
S2	H	E4	G07	2	4.08633
S2	H	E4	G08	2	4.9506
S2	H	E4	G09	2	4.47175
S2	H	E4	G10	2	5.12287
S2	H	E4	G11	2	3.4345
S2	H	E4	G12	2	3.3984
S2	H	E4	G13	2	2.63509
S2	H	E4	G14	2	2.6458
S2	H	E4	G15	2	2.40531
S2	H	E4	G16	2	3.13364
S2	H	E4	G17	2	2.43216
S2	H	E4	G18	2	5.74067
S2	H	E4	G19	2	4.03538
S2	H	E4	G20	2	4.79762
S2	C	E3	G01	3	4.09388
S2	C	E3	G02	3	5.25162
S2	C	E3	G03	3	4.10462
S2	C	E3	G04	3	7.04
S2	C	E3	G05	3	6.87102
S2	C	E3	G06	3	5.99506
S2	C	E3	G07	3	4.22027
S2	C	E3	G08	3	5.40478
S2	C	E3	G09	3	6.77679
S2	C	E3	G10	3	5.15912
S2	C	E3	G11	3	3.86904
S2	C	E3	G12	3	5.14302
S2	C	E3	G13	3	5.56212
S2	C	E3	G14	3	3.83692
S2	C	E3	G15	3	6.98215
S2	C	E3	G16	3	4.53867
S2	C	E3	G17	3	4.16205
S2	C	E3	G18	3	7.06367
S2	C	E3	G19	3	7.04
S2	C	E3	G20	3	5.05965
S2	H	E4	G01	3	2.76283
S2	H	E4	G02	3	3.4216
S2	H	E4	G03	3	3.53666
S2	H	E4	G04	3	4.52293
S2	H	E4	G05	3	4.25097
S2	H	E4	G06	3	3.3613
S2	H	E4	G07	3	4.15962
S2	H	E4	G08	3	5.03939
S2	H	E4	G09	3	4.55195
S2	H	E4	G10	3	5.14243
S2	H	E4	G11	3	3.4961
S2	H	E4	G12	3	3.45935
S2	H	E4	G13	3	2.68235
S2	H	E4	G14	3	2.59918
S2	H	E4	G15	3	2.36293
S2	H	E4	G16	3	3.07843
S2	H	E4	G17	3	2.38931
S2	H	E4	G18	3	5.63953
S2	H	E4	G19	3	4.1625
S2	H	E4	G20	3	4.9
S3	C	E5	G01	1	3.61063
S3	C	E5	G02	1	5.17913
S3	C	E5	G03	1	4.5063
S3	C	E5	G04	1	7.04
S3	C	E5	G05	1	5.25291
S3	C	E5	G06	1	5.59789
S3	C	E5	G07	1	4.52604
S3	C	E5	G08	1	5.62794
S3	C	E5	G09	1	5.65505
S3	C	E5	G10	1	5.36613
S3	C	E5	G11	1	4.13473
S3	C	E5	G12	1	5.21678
S3	C	E5	G13	1	5.20985
S3	C	E5	G14	1	4.36163
S3	C	E5	G15	1	6.24153
S3	C	E5	G16	1	4.69076
S3	C	E5	G17	1	3.6312
S3	C	E5	G18	1	6.86625
S3	C	E5	G19	1	7.05375
S3	C	E5	G20	1	4.97948
S3	H	E6	G01	1	2.87802
S3	H	E6	G02	1	3.83359
S3	H	E6	G03	1	3.70069
S3	H	E6	G04	1	5.32247
S3	H	E6	G05	1	4.40828
S3	H	E6	G06	1	3.96083
S3	H	E6	G07	1	4.08583
S3	H	E6	G08	1	4.91149
S3	H	E6	G09	1	4.60045
S3	H	E6	G10	1	5.05446
S3	H	E6	G11	1	3.45682
S3	H	E6	G12	1	3.85943
S3	H	E6	G13	1	3.32127
S3	H	E6	G14	1	2.98027
S3	H	E6	G15	1	3.70752
S3	H	E6	G16	1	3.5204
S3	H	E6	G17	1	2.6978
S3	H	E6	G18	1	5.79629
S3	H	E6	G19	1	5.03115
S3	H	E6	G20	1	4.97008
S3	C	E5	G01	2	3.88457
S3	C	E5	G02	2	5.49746
S3	C	E5	G03	2	4.47349
S3	C	E5	G04	2	6.93075
S3	C	E5	G05	2	5.90095
S3	C	E5	G06	2	5.23269
S3	C	E5	G07	2	4.30312
S3	C	E5	G08	2	5.57094
S3	C	E5	G09	2	6.23596
S3	C	E5	G10	2	5.55136
S3	C	E5	G11	2	4.10679
S3	C	E5	G12	2	5.39863
S3	C	E5	G13	2	4.77801
S3	C	E5	G14	2	4.26308
S3	C	E5	G15	2	6.80021
S3	C	E5	G16	2	5.12561
S3	C	E5	G17	2	3.78421
S3	C	E5	G18	2	6.72394
S3	C	E5	G19	2	7.04
S3	C	E5	G20	2	5.11062
S3	H	E6	G01	2	3.04273
S3	H	E6	G02	2	3.97801
S3	H	E6	G03	2	3.7188
S3	H	E6	G04	2	5.37503
S3	H	E6	G05	2	4.75483
S3	H	E6	G06	2	3.93958
S3	H	E6	G07	2	4.08801
S3	H	E6	G08	2	4.96983
S3	H	E6	G09	2	4.86017
S3	H	E6	G10	2	5.19923
S3	H	E6	G11	2	3.58526
S3	H	E6	G12	2	3.98127
S3	H	E6	G13	2	3.26644
S3	H	E6	G14	2	3.10468
S3	H	E6	G15	2	3.62727
S3	H	E6	G16	2	3.61412
S3	H	E6	G17	2	2.82005
S3	H	E6	G18	2	6.09929
S3	H	E6	G19	2	5.06944
S3	H	E6	G20	2	4.87452
S3	C	E5	G01	3	3.69282
S3	C	E5	G02	3	4.91175
S3	C	E5	G03	3	4.286
S3	C	E5	G04	3	7.04
S3	C	E5	G05	3	6.24537
S3	C	E5	G06	3	5.74877
S3	C	E5	G07	3	4.37586
S3	C	E5	G08	3	5.13202
S3	C	E5	G09	3	5.97477
S3	C	E5	G10	3	5.21818
S3	C	E5	G11	3	4.28852
S3	C	E5	G12	3	5.2639
S3	C	E5	G13	3	5.44402
S3	C	E5	G14	3	4.49315
S3	C	E5	G15	3	6.63914
S3	C	E5	G16	3	4.64671
S3	C	E5	G17	3	4.09664
S3	C	E5	G18	3	6.57732
S3	C	E5	G19	3	6.87706
S3	C	E5	G20	3	4.79689
S3	H	E6	G01	3	3.04944
S3	H	E6	G02	3	3.83563
S3	H	E6	G03	3	3.691
S3	H	E6	G04	3	5.5061
S3	H	E6	G05	3	4.70188
S3	H	E6	G06	3	3.93214
S3	H	E6	G07	3	4.04642
S3	H	E6	G08	3	5.03574
S3	H	E6	G09	3	4.98947
S3	H	E6	G10	3	5.21807
S3	H	E6	G11	3	3.64254
S3	H	E6	G12	3	3.84069
S3	H	E6	G13	3	3.42848
S3	H	E6	G14	3	3.10085
S3	H	E6	G15	3	3.43114
S3	H	E6	G16	3	3.43963
S3	H	E6	G17	3	2.79359
S3	H	E6	G18	3	5.84475
S3	H	E6	G19	3	5.17965
S3	H	E6	G20	3	4.75154
