# Supplementary material for: Selection of suitable wheat genotypes under thermal stress and complex genotype-environment interaction using stability analyses and selection indices
Source: PeerJ. 2025 Sep 25;13:e20061. doi: 10.7717/peerj.20061 (PMC12476864; doi:10.7717/peerj.20061)
Supplement: Supplemental Information 3 [file peerj-13-20061-s003.xlsx]

## Sheet: DA_HID
	-0.905056	-2.01221
	0.0642966	-0.298971
	0.633697	-1.24269
	0.383466	1.83937
	7.1544	1.37501
	9.12604	2.96274
	2.37234	-1.05282
	2.88142	0.172239
	3.95654	-1.32515
	3.48955	-0.516501
	3.17752	-1.82131
	3.43882	-0.338558
	-3.77849	0.609563
	-3.84288	0.0311293
	-2.26971	-1.32768
	-1.67658	-0.0573423
	-3.54969	-0.282332
	-5.99555	0.430644
	-5.73221	1.18408
	-8.92791	1.67079

## Sheet: indices 
Season	Genotype	Replicate	GYoc	Gytsc	TOL	STI	STIm	SSPI	SSI	YI	YSI	RDI	MP	GMP	HM	MRP	REI	PYR	SWP	RDC	ATI	SNPI
S1	G01	1	3.29175	3.07757	0.214177	0.381854	152.742	55.1585	0.489458	0.689107	0.934935	1.23358	3.18466	3.95563	3.18106	1.32819	0.440397	6.50649	1.69627	6.50649	0.0296347	9.7489
S1	G02	1	4.57188	4.24966	0.322216	0.732337	292.935	82.9823	0.530177	0.951552	0.929522	1.24076	4.41077	3.75104	4.40488	1.83917	0.844614	7.04778	1.9875	7.04778	0.061742	13.1206
S1	G03	1	4.46738	3.84534	0.622035	0.647515	259.006	160.197	1.04745	0.86102	0.86076	1.33988	4.15636	4.35716	4.13308	1.72835	0.746787	13.924	1.81932	13.924	0.112077	9.59073
S1	G04	1	7.04	6.48928	0.550721	1.72199	688.798	141.831	0.588475	1.45303	0.921773	1.25119	6.76464	5.203	6.75343	2.81983	1.986	7.82274	2.44574	7.82274	0.161818	19.3779
S1	G05	1	5.61972	4.69542	0.924309	0.994607	397.843	238.043	1.23729	1.05136	0.835524	1.38035	5.15757	6.03887	5.11616	2.14242	1.14709	16.4476	1.98069	16.4476	0.206406	11.1379
S1	G06	1	5.50248	4.66302	0.83946	0.967136	386.854	216.191	1.14765	1.04411	0.84744	1.36094	5.08275	5.08295	5.04808	2.1124	1.11541	15.256	1.98787	15.256	0.184851	11.3127
S1	G07	1	4.53145	4.21012	0.321334	0.719107	287.643	82.7552	0.533443	0.942698	0.929088	1.24134	4.37078	4.59676	4.36488	1.82247	0.829356	7.0912	1.97777	7.0912	0.0610144	12.973
S1	G08	1	4.85925	4.8	0.05925	0.87917	351.668	15.259	0.091725	1.07478	0.987807	1.16755	4.82963	4.52305	4.82944	2.01819	1.01396	1.21932	2.17749	1.21932	0.0124395	26.3205
S1	G09	1	5.17275	4.86571	0.307041	0.948703	379.481	79.0743	0.446523	1.08949	0.940643	1.22609	5.01923	4.98289	5.01453	2.09377	1.09415	5.93575	2.13937	5.93575	0.0669638	15.8748
S1	G10	1	5.27725	4.94296	0.334292	0.983235	393.294	86.0924	0.476526	1.10679	0.936654	1.23131	5.1101	5.0673	5.10464	2.13135	1.13398	6.33459	2.15171	6.33459	0.074222	15.7925
S1	G11	1	4.18	3.58403	0.595974	0.56469	225.876	153.485	1.07256	0.802508	0.857422	1.34509	3.88201	4.5455	3.85914	1.61404	0.651264	14.2578	1.753	14.2578	0.100279	8.87492
S1	G12	1	5.38478	4.42424	0.960531	0.897985	359.194	247.372	1.34188	0.990644	0.821621	1.4037	4.90451	4.39308	4.85748	2.03608	1.03566	17.8379	1.90658	17.8379	0.203809	10.2459
S1	G13	1	5.32593	4.17461	1.15131	0.838058	335.223	296.504	1.62617	0.934749	0.783829	1.47138	4.75027	4.85419	4.68051	1.96876	0.966543	21.6171	1.80892	21.6171	0.235998	9.14742
S1	G14	1	5.14937	3.60251	1.54686	0.699234	279.694	398.373	2.25978	0.806648	0.699602	1.64853	4.37594	4.63645	4.23924	1.80639	0.806436	30.0398	1.58755	30.0398	0.289628	7.22969
S1	G15	1	6.29612	4.49934	1.79678	1.06779	427.115	462.737	2.14679	1.00746	0.714621	1.61388	5.39773	4.76255	5.24821	2.22983	1.23149	28.5379	1.79313	28.5379	0.415735	9.14695
S1	G16	1	4.75475	3.80083	0.953923	0.68119	272.476	245.67	1.50923	0.851053	0.799375	1.44277	4.27779	4.62528	4.22461	1.77417	0.785625	20.0625	1.74307	20.0625	0.176289	8.50707
S1	G17	1	4.03123	3.07926	0.951961	0.467893	187.157	245.165	1.77644	0.689486	0.763853	1.50986	3.55524	3.91433	3.49152	1.47214	0.539627	23.6147	1.53366	23.6147	0.145804	6.58347
S1	G18	1	6.09098	6.01253	0.078448	1.3804	552.162	20.2032	0.0968866	1.34628	0.987121	1.16836	6.05175	4.33079	6.0515	2.52883	1.59204	1.28794	2.4362	1.28794	0.0206378	32.3762
S1	G19	1	6.71413	5.82516	0.888969	1.47421	589.684	228.942	0.996015	1.30433	0.867597	1.32932	6.26964	6.35365	6.23813	2.60785	1.70023	13.2403	2.24809	13.2403	0.241682	14.753
S1	G20	1	4.75341	4.47901	0.274398	0.80251	321.004	70.6675	0.434255	1.00291	0.942273	1.22397	4.61621	5.26207	4.61214	1.92577	0.925545	5.77266	2.05437	5.77266	0.0550408	14.7452
S1	G01	2	3.465	3.27308	0.191923	0.418785	167.514	49.938	0.473526	0.712422	0.944611	1.19887	3.36904	4.10649	3.36631	1.37811	0.47426	5.53891	1.75835	5.53891	0.027028	10.9204
S1	G02	2	4.8125	4.47304	0.339455	0.794888	317.955	88.3256	0.60302	0.973608	0.929464	1.21841	4.64277	3.96884	4.63657	1.89818	0.900183	7.05361	2.039	7.05361	0.0658607	13.8066
S1	G03	2	4.7025	3.83751	0.864994	0.666361	266.544	225.07	1.57255	0.835276	0.816057	1.38773	4.27	4.58634	4.2262	1.73874	0.754631	18.3943	1.76964	18.3943	0.153659	8.80771
S1	G04	2	7.04	6.14601	0.893987	1.59771	639.084	232.614	1.08562	1.33775	0.873013	1.29719	6.59301	5.1977	6.5627	2.69029	1.80935	12.6987	2.31637	12.6987	0.245907	15.7662
S1	G05	2	5.3175	5.18245	0.135048	1.01759	407.038	35.1393	0.217121	1.12802	0.974603	1.16198	5.24998	5.71677	5.24911	2.1496	1.15239	2.53969	2.24741	2.53969	0.029646	22.3027
S1	G06	2	5.1425	4.45757	0.684929	0.846456	338.582	178.217	1.13865	0.97024	0.86681	1.30648	4.80004	5.16244	4.7756	1.95823	0.958582	13.319	1.96567	13.319	0.137132	11.2692
S1	G07	2	4.235	4.08969	0.145308	0.639552	255.821	37.8088	0.293329	0.890167	0.965689	1.1727	4.16235	4.34486	4.16108	1.70379	0.724271	3.43111	1.9873	3.43111	0.0252882	15.946
S1	G08	2	5.115	4.98906	0.125939	0.942315	376.926	32.7692	0.210492	1.08592	0.975378	1.16105	5.05203	4.5737	5.05125	2.0686	1.06714	2.46216	2.20595	2.46216	0.0266042	21.6906
S1	G09	2	5.445	5.24859	0.19641	1.05529	422.116	51.1055	0.30838	1.14241	0.963928	1.17484	5.3468	5.21205	5.34499	2.1885	1.19508	3.60716	2.24928	3.60716	0.0439077	20.1319
S1	G10	2	5.555	5.06977	0.485232	1.03993	415.972	126.256	0.746767	1.10349	0.91265	1.24086	5.31238	5.39962	5.3013	2.17072	1.17768	8.73505	2.15103	8.73505	0.107682	14.6182
S1	G11	2	4.4	3.73603	0.663975	0.607008	242.803	172.765	1.29009	0.813187	0.849097	1.33373	4.06801	4.72303	4.04092	1.65853	0.687416	15.0903	1.78108	15.0903	0.112574	9.09386
S1	G12	2	5.0325	4.56414	0.468365	0.848153	339.261	121.868	0.795647	0.993435	0.906932	1.24868	4.79832	4.33607	4.78689	1.96028	0.960504	9.3068	2.03454	9.3068	0.0938669	12.8993
S1	G13	2	4.9775	3.89779	1.07971	0.716409	286.564	280.939	1.85446	0.848397	0.783082	1.44617	4.43764	4.76634	4.37197	1.8047	0.811309	21.6918	1.74708	21.6918	0.198875	8.53259
S1	G14	2	4.8125	3.56357	1.24893	0.633268	253.307	324.969	2.21864	0.775651	0.740482	1.52936	4.18804	4.33106	4.09492	1.70027	0.717155	25.9518	1.62443	25.9518	0.216283	7.42667
S1	G15	2	6.6275	4.84923	1.77827	1.18674	474.694	462.703	2.29387	1.05549	0.731683	1.54776	5.73836	4.85979	5.6006	2.32882	1.34394	26.8317	1.88364	26.8317	0.421567	10.017
S1	G16	2	5.005	4.09459	0.910413	0.756738	302.695	236.888	1.55509	0.891232	0.818099	1.38427	4.54979	4.9265	4.50425	1.85282	0.856981	18.1901	1.83024	18.1901	0.172347	9.42841
S1	G17	2	3.7675	3.20794	0.559558	0.446284	178.514	145.596	1.26973	0.698244	0.851478	1.33	3.48772	3.92764	3.46528	1.42207	0.505402	14.8522	1.65272	14.8522	0.081347	7.84612
S1	G18	2	6.6925	6.45791	0.234587	1.59592	638.37	61.039	0.299664	1.40564	0.964948	1.1736	6.57521	4.63348	6.57311	2.69139	1.80733	3.50522	2.49631	3.50522	0.0644912	25.0033
S1	G19	2	7.0675	6.1968	0.870696	1.61721	646.882	226.553	1.05322	1.3488	0.876803	1.29159	6.63215	6.75583	6.60358	2.70662	1.83143	12.3197	2.33096	12.3197	0.240957	16.0455
S1	G20	2	4.86675	4.57018	0.296567	0.821305	328.522	77.1663	0.52096	0.994751	0.939063	1.20595	4.71847	5.49166	4.71381	1.92975	0.9301	6.09374	2.07164	6.09374	0.058488	14.785
S1	G01	3	3.70755	3.33605	0.371505	0.445934	178.374	97.827	0.78503	0.725977	0.899798	1.27397	3.5218	4.25593	3.512	1.43011	0.511182	10.0202	1.73256	10.0202	0.0539984	9.21221
S1	G02	3	5.14937	4.35006	0.799312	0.827145	330.858	210.48	1.2161	0.946644	0.844775	1.35695	4.74972	4.1447	4.71609	1.9246	0.925778	15.5225	1.91698	15.5225	0.15635	10.4988
S1	G03	3	5.03167	3.97273	1.05894	0.738131	295.252	278.847	1.6488	0.864531	0.789545	1.45187	4.5022	4.67847	4.43994	1.82012	0.82615	21.0455	1.77106	21.0455	0.195673	8.77129
S1	G04	3	7.04	6.26013	0.779867	1.62738	650.95	205.359	0.867873	1.36231	0.889223	1.28912	6.65007	5.28848	6.6272	2.69933	1.82143	11.0777	2.35938	11.0777	0.213971	16.7521
S1	G05	3	5.10163	5.01528	0.086346	0.94479	377.916	22.7372	0.1326	1.09141	0.983075	1.16605	5.05845	5.65127	5.05808	2.06032	1.05745	1.69252	2.22045	1.69252	0.018051	24.6734
S1	G06	3	4.88537	4.50298	0.382399	0.812324	324.93	100.696	0.613236	0.97992	0.921726	1.24366	4.69418	4.9499	4.68639	1.90775	0.909189	7.82742	2.03728	7.82742	0.0741263	13.4445
S1	G07	3	4.02325	3.93322	0.0900343	0.584328	233.731	23.7084	0.175323	0.855931	0.977622	1.17256	3.97823	4.25636	3.97772	1.62004	0.654006	2.23785	1.96092	2.23785	0.0148022	17.647
S1	G08	3	5.47305	5.03209	0.44096	1.01697	406.789	116.116	0.631217	1.09506	0.919431	1.24677	5.25257	4.63969	5.24332	2.13451	1.13824	8.05694	2.15097	8.05694	0.0956412	14.8865
S1	G09	3	5.82615	5.42699	0.399161	1.16754	467.017	105.109	0.536753	1.181	0.931488	1.23063	5.62657	5.41458	5.61949	2.28751	1.30676	6.85119	2.24837	6.85119	0.092763	16.9077
S1	G10	3	5.94385	5.21188	0.731967	1.14392	457.566	192.746	0.96479	1.13419	0.876853	1.30731	5.57787	5.67954	5.55385	2.26303	1.28032	12.3147	2.13777	12.3147	0.168376	13.4971
S1	G11	3	4.708	3.78898	0.919022	0.658704	263.482	242.002	1.52932	0.824543	0.804796	1.42436	4.24849	4.95354	4.19879	1.71866	0.737251	19.5204	1.74624	19.5204	0.160421	8.54765
S1	G12	3	4.78087	4.22204	0.558839	0.745351	298.141	147.157	0.915773	0.918783	0.88311	1.29805	4.50146	4.25613	4.48411	1.82676	0.834231	11.689	1.93094	11.689	0.103767	11.1116
S1	G13	3	4.72863	4.08793	0.640694	0.713789	285.516	168.712	1.06151	0.8896	0.864507	1.32598	4.40828	4.46816	4.385	1.78765	0.798905	13.5493	1.87991	13.5493	0.11642	10.2808
S1	G14	3	4.57188	3.44073	1.13114	0.580867	232.347	297.859	1.93835	0.748759	0.752587	1.52317	4.0063	4.32314	3.92646	1.61701	0.650133	24.7413	1.60918	24.7413	0.185416	7.26326
S1	G15	3	7.09142	5.12426	1.96716	1.34183	536.731	518.005	2.17328	1.11512	0.7226	1.58638	6.10784	4.93961	5.94945	2.46186	1.50183	27.74	1.92426	27.74	0.490094	10.4936
S1	G16	3	5.35535	4.05638	1.29897	0.802156	320.862	342.052	1.90028	0.882735	0.757445	1.5134	4.70587	5.23853	4.61623	1.89978	0.897809	24.2555	1.75285	24.2555	0.250218	8.609
S1	G17	3	3.57912	3.19787	0.381251	0.422639	169.056	100.393	0.834532	0.695909	0.893479	1.28298	3.3885	3.81029	3.37778	1.37565	0.473037	10.6521	1.69034	10.6521	0.0533074	8.66326
S1	G18	3	6.40787	6.04996	0.35791	1.43152	572.61	94.2471	0.437591	1.31657	0.944145	1.21413	6.22892	4.52676	6.22378	2.53356	1.60223	5.58547	2.38999	5.58547	0.092101	20.1295
S1	G19	3	7.04	6.1035	0.936504	1.58666	634.663	246.606	1.04219	1.32822	0.866974	1.32221	6.57175	6.52624	6.53838	2.66524	1.77586	13.3026	2.30034	13.3026	0.253713	15.4356
S1	G20	3	4.88542	4.77288	0.11254	0.861023	344.409	29.6347	0.180473	1.03866	0.976964	1.17335	4.82915	5.4606	4.8285	1.96651	0.963695	2.30359	2.15938	2.30359	0.0224597	21.2106
S2	G01	1	3.75627	2.67846	1.07781	0.379232	151.693	277.575	2.15851	0.599741	0.713064	1.6174	3.21737	4.45827	3.1271	1.32901	0.437373	28.6936	1.382	28.6936	0.148618	5.43791
S2	G02	1	5.54577	3.31712	2.22865	0.693402	277.361	573.96	3.02308	0.742744	0.598134	1.92818	4.43144	3.85411	4.15123	1.81944	0.799709	40.1866	1.40857	40.1866	0.415541	6.23628
S2	G03	1	4.3101	3.42865	0.881442	0.557023	222.809	227.004	1.53842	0.767719	0.795494	1.44981	3.86937	3.78115	3.81918	1.60451	0.642422	20.4506	1.65151	20.4506	0.147302	7.63218
S2	G04	1	7.04	4.38481	2.65519	1.16355	465.421	683.809	2.83721	0.981813	0.622842	1.85169	5.7124	4.91302	5.40386	2.34861	1.34194	37.7158	1.65259	37.7158	0.641309	8.3493
S2	G05	1	5.18833	4.12115	1.06717	0.805951	322.38	274.836	1.54731	0.922778	0.794313	1.45196	4.65474	4.76968	4.59357	1.93008	0.929514	20.5687	1.80928	20.5687	0.21452	9.15846
S2	G06	1	6.05329	3.25865	2.79463	0.743519	297.408	719.72	3.47298	0.729653	0.538328	2.1424	4.65597	4.99465	4.23662	1.90488	0.85751	46.1672	1.32447	46.1672	0.539572	5.98205
S2	G07	1	4.81708	3.96154	0.855538	0.7193	287.72	220.332	1.33606	0.887038	0.822395	1.40238	4.38931	3.96197	4.34762	1.82226	0.829578	17.7605	1.80498	17.7605	0.16247	9.18621
S2	G08	1	6.14088	4.79942	1.34146	1.11092	444.368	345.475	1.6433	1.07465	0.781552	1.47567	5.47015	4.93228	5.38791	2.26689	1.28124	21.8448	1.93675	21.8448	0.31659	10.4854
S2	G09	1	5.8651	4.33519	1.5299	0.958398	383.359	394.006	1.96226	0.970704	0.739151	1.56032	5.10014	5.30557	4.98541	2.1094	1.10533	26.0849	1.79007	26.0849	0.335363	9.02231
S2	G10	1	5.17725	5.16596	0.0112885	1.00812	403.249	2.90719	0.0164023	1.15672	0.99782	1.15583	5.17161	4.73755	5.1716	2.16187	1.16268	0.21804	2.2704	0.21804	0.00253787	50.1923
S2	G11	1	3.86946	3.32962	0.539846	0.485632	194.253	139.03	1.04951	0.745543	0.860485	1.3403	3.59954	4.47096	3.5793	1.49679	0.560085	13.9515	1.69266	13.9515	0.0842368	8.29959
S2	G12	1	5.40106	3.29462	2.10644	0.670727	268.291	542.486	2.93386	0.737706	0.609994	1.89069	4.34784	4.24069	4.0927	1.78631	0.773559	39.0006	1.41764	39.0006	0.386279	6.23067
S2	G13	1	5.44219	2.55462	2.88758	0.524037	209.615	743.656	3.99143	0.57201	0.469409	2.45695	3.9984	4.23437	3.47706	1.6286	0.604379	53.0591	1.09506	53.0591	0.468051	4.61533
S2	G14	1	3.91077	2.51981	1.39096	0.371443	148.577	358.222	2.6756	0.564217	0.644326	1.78995	3.21529	3.16078	3.06485	1.32348	0.42839	35.5674	1.2742	35.5674	0.189818	4.85932
S2	G15	1	5.85556	2.29077	3.56479	0.505606	202.242	918.063	4.57967	0.512932	0.391213	2.94804	4.07316	3.84121	3.2932	1.64977	0.583122	60.8787	0.946667	60.8787	0.567568	4.12501
S2	G16	1	4.37652	2.98442	1.3921	0.492325	196.93	358.516	2.39281	0.66825	0.681917	1.69128	3.68047	3.16632	3.54884	1.51794	0.567805	31.8083	1.42658	31.8083	0.218712	5.90601
S2	G17	1	3.4949	2.31635	1.17856	0.305141	122.057	303.522	2.53679	0.518659	0.662778	1.74012	2.90563	3.22959	2.78612	1.19718	0.351924	33.7222	1.23904	33.7222	0.145774	4.52121
S2	G18	1	7.04	5.46731	1.57269	1.4508	580.322	405.026	1.6805	1.2242	0.776606	1.48507	6.25365	4.0382	6.15478	2.591	1.67323	22.3394	2.06057	22.3394	0.424157	11.8697
S2	G19	1	7.04	4.23715	2.80285	1.12437	449.748	721.835	2.99499	0.948752	0.601868	1.91622	5.63858	6.20402	5.29026	2.31555	1.29675	39.8132	1.59694	39.8132	0.665476	7.98026
S2	G20	1	5.29146	4.8	0.491462	0.957369	382.948	126.569	0.698687	1.07478	0.907122	1.2714	5.04573	4.73505	5.03376	2.1021	1.10415	9.28782	2.08667	9.28782	0.107673	13.5746
S2	G01	2	4.0616	2.81238	1.24921	0.43056	172.224	321.718	2.3137	0.629728	0.692433	1.66559	3.43699	4.6689	3.32348	1.41828	0.496571	30.7567	1.39549	30.7567	0.18354	5.61131
S2	G02	2	5.84554	3.48297	2.36257	0.767427	306.971	608.447	3.04038	0.779881	0.595834	1.93563	4.66425	4.05461	4.36508	1.91478	0.885083	40.4166	1.44058	40.4166	0.463427	6.54088
S2	G03	2	3.91531	3.60009	0.315219	0.531302	212.521	81.1804	0.605641	0.806104	0.919491	1.2543	3.7577	3.69282	3.75109	1.56625	0.612757	8.05095	1.81941	8.05095	0.0514472	10.6531
S2	G04	2	6.82149	4.60405	2.21744	1.18381	473.524	571.072	2.44535	1.0309	0.674933	1.70878	5.71277	4.9556	5.49759	2.35528	1.3653	32.5067	1.76279	32.5067	0.540221	9.06356
S2	G05	2	6.70027	4.32721	2.37306	1.09286	437.142	611.149	2.66431	0.968917	0.645827	1.78579	5.51374	5.55413	5.25841	2.26976	1.2604	35.4173	1.67171	35.4173	0.55548	8.35218
S2	G06	2	5.58	3.42159	2.15841	0.719655	287.862	555.87	2.90984	0.766136	0.613188	1.88085	4.50079	4.91384	4.24202	1.84948	0.829987	38.6812	1.44847	38.6812	0.409992	6.48152
S2	G07	2	4.583	4.08633	0.496673	0.705904	282.362	127.911	0.815247	0.91498	0.891627	1.29349	4.33466	3.95994	4.32044	1.80476	0.814128	10.8373	1.90879	10.8373	0.0934376	11.0105
S2	G08	2	5.66883	4.9506	0.718222	1.05783	423.13	184.968	0.95309	1.1085	0.873303	1.32063	5.30972	4.81297	5.28543	2.20909	1.22	12.6697	2.07927	12.6697	0.165403	12.7089
S2	G09	2	6.64577	4.47175	2.17402	1.12017	448.07	559.889	2.46086	1.00128	0.672872	1.71402	5.55876	5.7359	5.3462	2.29154	1.29191	32.7128	1.73462	32.7128	0.51521	8.78997
S2	G10	2	5.15887	5.12287	0.0359965	0.996162	398.465	9.2704	0.0524897	1.14707	0.993022	1.16142	5.14087	4.80304	5.1408	2.14865	1.14889	0.697759	2.25547	0.697759	0.00804457	33.8046
S2	G11	2	4.03358	3.4345	0.599079	0.522175	208.87	154.285	1.11728	0.769027	0.851477	1.35448	3.73404	4.54571	3.71001	1.55214	0.602231	14.8523	1.71009	14.8523	0.0969327	8.40017
S2	G12	2	6.01638	3.3984	2.61799	0.770676	308.271	674.228	3.27341	0.760943	0.564857	2.04178	4.70739	4.54569	4.3434	1.92901	0.888831	43.5143	1.3855	43.5143	0.514615	6.29741
S2	G13	2	4.8274	2.63509	2.19232	0.47948	191.792	564.602	3.41632	0.590029	0.54586	2.11284	3.73124	4.05036	3.40922	1.52726	0.552991	45.414	1.19933	45.414	0.339913	4.84945
S2	G14	2	3.95429	2.6458	1.30849	0.394355	157.742	336.984	2.48926	0.592427	0.669096	1.72369	3.30004	3.22799	3.17034	1.36014	0.454815	33.0904	1.33052	33.0904	0.183989	5.18699
S2	G15	2	6.509	2.40531	4.10369	0.59013	236.052	1056.85	4.74274	0.538579	0.369536	3.12098	4.45715	4.14988	3.51259	1.80228	0.680604	63.0464	0.942787	63.0464	0.705874	4.34036
S2	G16	2	4.89587	3.13364	1.76222	0.578285	231.314	453.836	2.70769	0.701662	0.640059	1.80188	4.01475	3.43163	3.82138	1.65218	0.666943	35.9941	1.41623	35.9941	0.300061	6.02709
S2	G17	2	3.98929	2.43216	1.55712	0.365722	146.289	401.016	2.93627	0.544592	0.609674	1.89169	3.21073	3.53568	3.02193	1.3191	0.421792	39.0326	1.21771	39.0326	0.210852	4.59901
S2	G18	2	7.04	5.74067	1.29933	1.52334	609.338	334.624	1.3884	1.28541	0.815437	1.41435	6.39034	4.13793	6.32429	2.65221	1.75689	18.4563	2.1636	18.4563	0.359084	13.1623
S2	G19	2	7.04	4.03538	3.00462	1.07083	428.332	773.798	3.21059	0.903573	0.573208	2.01203	5.53769	6.35723	5.13013	2.27037	1.235	42.6792	1.52089	42.6792	0.696189	7.50268
S2	G20	2	5.36702	4.79762	0.569404	0.970557	388.223	146.642	0.798097	1.07425	0.893907	1.29019	5.08232	4.65381	5.06637	2.11624	1.11936	10.6093	2.0709	10.6093	0.125606	13.0129
S2	G01	3	4.09388	2.76283	1.33105	0.426337	170.535	342.794	2.44584	0.618633	0.674868	1.70894	3.42836	4.55122	3.29916	1.41345	0.4917	32.5132	1.36548	32.5132	0.194603	5.43895
S2	G02	3	5.25162	3.4216	1.83001	0.677307	270.923	471.295	2.62138	0.76614	0.651534	1.77015	4.33661	3.80911	4.14355	1.78573	0.781146	34.8466	1.49308	34.8466	0.337229	6.62843
S2	G03	3	4.10462	3.53666	0.567959	0.547177	218.871	146.27	1.04091	0.791902	0.861629	1.33853	3.82064	3.74758	3.79953	1.5888	0.631066	13.8371	1.74565	13.8371	0.0940718	8.83774
S2	G04	3	7.04	4.52293	2.51707	1.2002	480.081	648.238	2.68962	1.01274	0.642462	1.79515	5.78146	4.9898	5.5075	2.37954	1.38421	35.7538	1.70464	35.7538	0.617449	8.71166
S2	G05	3	6.87102	4.25097	2.62005	1.10096	440.384	674.758	2.86851	0.951845	0.618681	1.86415	5.56099	5.57469	5.25239	2.28584	1.26975	38.1319	1.62173	38.1319	0.615565	8.07606
S2	G06	3	5.99506	3.3613	2.63376	0.759562	303.825	678.288	3.30484	0.752638	0.560679	2.05699	4.67818	5.04825	4.30749	1.91656	0.876013	43.9321	1.37281	43.9321	0.513967	6.21871
S2	G07	3	4.22027	4.15962	0.0606538	0.661692	264.677	15.6206	0.108115	0.93139	0.985628	1.17013	4.18994	3.76638	4.18972	1.75074	0.763138	1.4372	2.0248	1.4372	0.0110475	21.6011
S2	G08	3	5.40478	5.03939	0.365388	1.02664	410.657	94.1009	0.508564	1.12838	0.932395	1.23694	5.22209	4.7415	5.2157	2.17771	1.18404	6.76047	2.16765	6.76047	0.0828978	15.7676
S2	G09	3	6.77679	4.55195	2.22484	1.16274	465.098	572.977	2.46969	1.01924	0.671698	1.71701	5.66437	5.84388	5.4459	2.33493	1.34101	32.8302	1.74858	32.8302	0.537178	8.94003
S2	G10	3	5.15912	5.14243	0.0166894	1.00001	400.005	4.29814	0.0243352	1.15145	0.996765	1.15706	5.15077	4.84603	5.15076	2.15308	1.15333	0.323494	2.26402	0.323494	0.003737	43.8154
S2	G11	3	3.86904	3.4961	0.372942	0.509858	203.943	96.0462	0.725116	0.78282	0.903609	1.27634	3.68257	4.46052	3.67313	1.53398	0.588025	9.63915	1.77739	9.63915	0.0596272	9.77246
S2	G12	3	5.14302	3.45935	1.68367	0.670617	268.247	433.607	2.46268	0.774591	0.672629	1.71463	4.30118	4.24034	4.13642	1.77309	0.773431	32.7371	1.5254	32.7371	0.308726	6.7989
S2	G13	3	5.56212	2.68235	2.87977	0.562364	224.946	741.646	3.89481	0.600611	0.482253	2.39151	4.12223	4.38649	3.61928	1.68048	0.648581	51.7747	1.13735	51.7747	0.483554	4.85612
S2	G14	3	3.83692	2.59918	1.23774	0.375909	150.363	318.764	2.4267	0.581989	0.677413	1.70253	3.21805	3.20811	3.09904	1.32692	0.43354	32.2587	1.32692	32.2587	0.169922	5.1264
S2	G15	3	6.98215	2.36293	4.61923	0.621874	248.75	1189.62	4.97678	0.529089	0.338424	3.40789	4.67254	4.26003	3.53091	1.88466	0.717215	66.1576	0.894244	66.1576	0.815641	4.28784
S2	G16	3	4.53867	3.07843	1.46024	0.526649	210.66	376.065	2.42027	0.6893	0.678267	1.70038	3.80855	3.27484	3.66858	1.57047	0.607391	32.1733	1.44499	32.1733	0.237281	6.07537
S2	G17	3	4.16205	2.38931	1.77274	0.374837	149.935	456.546	3.2041	0.534997	0.57407	2.00901	3.27568	3.57947	3.03584	1.34305	0.432305	42.593	1.17117	42.593	0.243022	4.44408
S2	G18	3	7.06367	5.63953	1.42415	1.50154	600.615	366.769	1.51667	1.26276	0.798385	1.44456	6.3516	4.1082	6.27177	2.63415	1.73174	20.1615	2.12191	20.1615	0.390751	12.6042
S2	G19	3	7.04	4.1625	2.8775	1.10456	441.824	741.061	3.07476	0.932036	0.591264	1.95059	5.60125	6.30097	5.23169	2.29883	1.2739	40.8736	1.5688	40.8736	0.677156	7.80017
S2	G20	3	5.05965	4.9	0.159654	0.9345	373.8	41.1167	0.237371	1.09717	0.968446	1.19089	4.97983	4.58921	4.97855	2.07949	1.07777	3.15543	2.17839	3.15543	0.0345579	19.6365
S3	G01	1	3.61063	2.87802	0.732617	0.391687	156.675	188.676	1.52638	0.644424	0.797095	1.4469	3.24433	4.24018	3.20297	1.34542	0.451738	20.2905	1.51461	20.2905	0.102666	6.42099
S3	G02	1	5.17913	3.83359	1.34555	0.748385	299.354	346.527	1.95438	0.858389	0.740199	1.55811	4.50636	3.86078	4.40592	1.8639	0.863122	25.9801	1.68452	25.9801	0.260639	7.98703
S3	G03	1	4.5063	3.70069	0.805605	0.628587	251.435	207.473	1.34484	0.828631	0.821227	1.40438	4.1035	4.15636	4.06396	1.70352	0.724958	17.8773	1.7433	17.8773	0.143016	8.56491
S3	G04	1	7.04	5.32247	1.71753	1.41237	564.948	442.326	1.83527	1.19177	0.756033	1.52548	6.18124	5.1042	6.06193	2.55856	1.6289	24.3967	2.00598	24.3967	0.457043	11.2779
S3	G05	1	5.25291	4.40828	0.844629	0.872836	349.134	217.523	1.20958	0.98707	0.839208	1.37429	4.8306	5.28758	4.79368	2.00691	1.00665	16.0792	1.9234	16.0792	0.176689	10.5277
S3	G06	1	5.59789	3.96083	1.63706	0.835745	334.298	421.603	2.19993	0.88688	0.707558	1.62999	4.77936	4.96761	4.63918	1.9737	0.963876	29.2442	1.67407	29.2442	0.335104	8.00241
S3	G07	1	4.52604	4.08583	0.440211	0.697045	278.818	113.37	0.731664	0.914868	0.902738	1.27757	4.30593	4.23402	4.29468	1.79359	0.803911	9.72619	1.92053	9.72619	0.0822943	11.3885
S3	G08	1	5.62794	4.91149	0.716452	1.0419	416.759	184.513	0.957649	1.09974	0.872697	1.32155	5.26972	4.79529	5.24536	2.19239	1.20163	12.7303	2.07032	12.7303	0.163749	12.59
S3	G09	1	5.65505	4.60045	1.0546	0.980617	392.247	271.597	1.40288	1.0301	0.813512	1.4177	5.12775	5.27017	5.07353	2.12801	1.13096	18.6488	1.93456	18.6488	0.233838	10.5164
S3	G10	1	5.36613	5.05446	0.311665	1.02235	408.939	80.2652	0.436914	1.13176	0.94192	1.22443	5.21029	4.96856	5.20563	2.17358	1.17909	5.80801	2.18195	5.80801	0.0705612	16.6067
S3	G11	1	4.13473	3.45682	0.67791	0.538749	215.5	174.587	1.23337	0.774025	0.836045	1.37949	3.79578	4.57152	3.76551	1.57677	0.621346	16.3955	1.70002	16.3955	0.111415	8.20783
S3	G12	1	5.21678	3.85943	1.35735	0.758906	303.562	349.567	1.9573	0.864175	0.739811	1.55893	4.5381	4.24658	4.43661	1.877	0.875256	26.0189	1.68975	26.0189	0.264767	8.03767
S3	G13	1	5.20985	3.32127	1.88857	0.652217	260.887	486.376	2.72695	0.743675	0.637499	1.80912	4.26556	4.48409	4.05652	1.75515	0.75221	36.2501	1.4551	36.2501	0.341514	6.37806
S3	G14	1	4.36163	2.98027	1.38136	0.489967	195.987	355.751	2.38247	0.66732	0.683292	1.68788	3.67095	3.80607	3.541	1.51412	0.565086	31.6708	1.42702	31.6708	0.216506	5.90396
S3	G15	1	6.24153	3.70752	2.53401	0.872241	348.896	652.6	3.05412	0.830159	0.594008	1.94158	4.97452	4.31294	4.65182	2.04194	1.00597	40.5992	1.48401	40.5992	0.529914	6.95653
S3	G16	1	4.69076	3.5204	1.17036	0.622441	248.976	301.409	1.87691	0.788262	0.750498	1.53673	4.10558	4.17026	4.02217	1.69896	0.717869	24.9502	1.62544	24.9502	0.20675	7.41455
S3	G17	1	3.6312	2.6978	0.933397	0.369253	147.701	240.384	1.93368	0.604072	0.742951	1.55234	3.1645	3.57537	3.09568	1.30906	0.425864	25.7049	1.41575	25.7049	0.127001	5.63688
S3	G18	1	6.86625	5.79629	1.06996	1.50014	600.057	275.554	1.17224	1.29786	0.844171	1.36621	6.33127	4.30393	6.28606	2.63093	1.73013	15.5829	2.21203	15.5829	0.293435	13.9726
S3	G19	1	7.05375	5.03115	2.0226	1.33767	535.07	520.892	2.15704	1.12654	0.71326	1.61696	6.04245	6.39418	5.8732	2.496	1.54276	28.674	1.89434	28.674	0.523796	10.2156
S3	G20	1	4.97948	4.97008	0.00940525	0.932845	373.138	2.42219	0.0142087	1.11286	0.998111	1.1555	4.97478	5.00525	4.97477	2.07961	1.07586	0.18888	2.22726	0.18888	0.00203401	50.6536
S3	G01	2	3.88457	3.04273	0.841842	0.445522	178.209	216.805	1.63026	0.681306	0.783286	1.4724	3.46365	4.45562	3.4125	1.43548	0.513826	21.6714	1.5438	21.6714	0.125818	6.66273
S3	G02	2	5.49746	3.97801	1.51945	0.824309	329.724	391.313	2.07918	0.890726	0.723609	1.59383	4.73773	4.0899	4.61591	1.95804	0.950686	27.6391	1.69662	27.6391	0.308894	8.15414
S3	G03	2	4.47349	3.7188	0.754694	0.627063	250.825	194.361	1.26909	0.832685	0.831296	1.38737	4.09614	4.21848	4.06138	1.7012	0.7232	16.8704	1.75824	16.8704	0.133815	8.75523
S3	G04	2	6.93075	5.37503	1.55571	1.40418	561.673	400.653	1.68857	1.20354	0.775534	1.48712	6.15289	5.07681	6.05455	2.54912	1.61946	22.4466	2.0417	22.4466	0.412781	11.6538
S3	G05	2	5.90095	4.75483	1.14612	1.0576	423.038	295.167	1.46108	1.06467	0.805774	1.43131	5.32789	5.63185	5.26625	2.21032	1.21974	19.4226	1.95738	19.4226	0.263916	10.7419
S3	G06	2	5.23269	3.93958	1.29311	0.777029	310.812	333.023	1.859	0.882121	0.752879	1.53187	4.58613	4.98804	4.49498	1.89803	0.896157	24.7121	1.72221	24.7121	0.25523	8.31885
S3	G07	2	4.30312	4.08801	0.215115	0.663069	265.227	55.4001	0.376059	0.915357	0.950009	1.214	4.19557	4.11734	4.19281	1.7508	0.764725	4.99905	1.9707	4.99905	0.0392219	14.0995
S3	G08	2	5.57094	4.96983	0.601106	1.0436	417.439	154.807	0.811692	1.11281	0.8921	1.29281	5.27039	4.77222	5.25325	2.19439	1.20359	10.79	2.10561	10.79	0.137498	13.4091
S3	G09	2	6.23596	4.86017	1.37579	1.1424	456.959	354.316	1.65965	1.08825	0.779378	1.47979	5.54807	5.56702	5.46277	2.29895	1.31754	22.0622	1.94626	22.0622	0.32926	10.5886
S3	G10	2	5.55136	5.19923	0.352129	1.08793	435.172	90.686	0.477168	1.16417	0.936569	1.23142	5.37529	5.19428	5.36953	2.24195	1.25472	6.34311	2.20668	6.34311	0.0822395	16.604
S3	G11	2	4.10679	3.58526	0.521527	0.554991	221.996	134.312	0.955307	0.802785	0.873009	1.32108	3.84603	4.62084	3.82835	1.60011	0.640078	12.6991	1.76917	12.6991	0.0869957	9.19758
S3	G12	2	5.39863	3.98127	1.41736	0.810153	324.061	365.023	1.975	0.891455	0.737459	1.5639	4.68995	4.39949	4.58286	1.93958	0.93436	26.2541	1.71348	26.2541	0.285656	8.27159
S3	G13	2	4.77801	3.26644	1.51158	0.58828	235.312	389.286	2.37986	0.731396	0.683639	1.68702	4.02223	4.36148	3.88021	1.65903	0.678471	31.6361	1.49434	31.6361	0.259598	6.47251
S3	G14	2	4.26308	3.10468	1.1584	0.498889	199.555	298.33	2.0441	0.695178	0.728272	1.58363	3.68388	3.73163	3.59282	1.52284	0.575375	27.1728	1.50368	27.1728	0.183205	6.39242
S3	G15	2	6.80021	3.62727	3.17294	0.929747	371.899	817.149	3.51001	0.812191	0.533405	2.16217	5.21374	4.59484	4.731	2.13243	1.07229	46.6595	1.39097	46.6595	0.685052	6.6484
S3	G16	2	5.12561	3.61412	1.51149	0.698248	279.299	389.264	2.21835	0.809246	0.70511	1.63565	4.36986	4.31184	4.23916	1.80437	0.805299	29.489	1.59635	29.489	0.282806	7.28664
S3	G17	2	3.78421	2.82005	0.964154	0.402249	160.899	248.305	1.91664	0.631445	0.745216	1.54762	3.30213	3.69818	3.23175	1.36614	0.463919	25.4784	1.44967	25.4784	0.136922	5.90625
S3	G18	2	6.72394	6.09929	0.624644	1.54584	618.338	160.869	0.69884	1.36571	0.907101	1.27143	6.41162	4.35452	6.3964	2.67114	1.78284	9.28986	2.35216	9.28986	0.173898	17.2475
S3	G19	2	7.04	5.06944	1.97056	1.34523	538.09	507.491	2.10565	1.13511	0.720091	1.60162	6.05472	6.55279	5.89439	2.50191	1.55147	27.9909	1.91062	27.9909	0.511759	10.3572
S3	G20	2	5.11062	4.87452	0.236104	0.939005	375.602	60.8054	0.347535	1.09147	0.953801	1.20918	4.99257	5.08999	4.98978	2.08368	1.08297	4.61987	2.15623	4.61987	0.051229	17.248
S3	G01	3	3.69282	3.04944	0.643378	0.424463	169.785	165.693	1.31062	0.682808	0.825776	1.39664	3.37113	4.2088	3.34043	1.39976	0.489539	17.4224	1.58687	17.4224	0.0938566	7.11149
S3	G02	3	4.91175	3.83563	1.07611	0.710126	284.05	277.138	1.64813	0.858846	0.78091	1.47688	4.37369	3.87015	4.3075	1.81245	0.818997	21.909	1.73069	21.909	0.20305	8.37306
S3	G03	3	4.286	3.691	0.594997	0.596291	238.516	153.233	1.04432	0.826461	0.861176	1.33923	3.9885	4.05457	3.96631	1.65857	0.68771	13.8824	1.78286	13.8824	0.102878	9.21421
S3	G04	3	7.04	5.5061	1.5339	1.4611	584.44	395.034	1.63905	1.23289	0.782117	1.4746	6.27305	5.09751	6.17928	2.59968	1.6851	21.7883	2.07519	21.7883	0.415159	12.0379
S3	G05	3	6.24537	4.70188	1.54349	1.10686	442.744	397.505	1.85915	1.05281	0.752858	1.53191	5.47363	5.8641	5.36481	2.26533	1.27656	24.7142	1.88145	24.7142	0.363604	9.92814
S3	G06	3	5.74877	3.93214	1.81663	0.852052	340.821	467.848	2.37717	0.880455	0.683997	1.68614	4.84045	5.19904	4.67001	1.99656	0.982682	31.6003	1.63999	31.6003	0.375472	7.7936
S3	G07	3	4.37586	4.04642	0.329444	0.667416	266.966	84.8439	0.566353	0.906043	0.924713	1.24721	4.21114	4.14807	4.20469	1.7556	0.769739	7.52867	1.93437	7.52867	0.060264	12.2323
S3	G08	3	5.13202	5.03574	0.0962743	0.974124	389.649	24.7942	0.141121	1.12757	0.98124	1.17536	5.08388	4.557	5.08342	2.12393	1.12347	1.87596	2.2229	1.87596	0.0212763	23.9463
S3	G09	3	5.97477	4.98947	0.985299	1.12367	449.467	253.75	1.24055	1.1172	0.83509	1.38106	5.48212	5.4852	5.43785	2.27719	1.29594	16.491	2.04124	16.491	0.233865	11.826
S3	G10	3	5.21818	5.21807	0.000111635	1.02634	410.537	0.02875	0.000160934	1.16839	0.999979	1.15334	5.21813	5.10255	5.21813	2.18149	1.18369	0.00213934	2.28429	0.00213934	2.53235e-05	236.696
S3	G11	3	4.28852	3.64254	0.645982	0.588808	235.523	166.364	1.13314	0.81561	0.849369	1.35785	3.96553	4.73052	3.93922	1.64821	0.67908	15.0631	1.75894	15.0631	0.11099	8.87116
S3	G12	3	5.2639	3.84069	1.42321	0.762043	304.817	366.527	2.0339	0.859979	0.729629	1.58068	4.55229	4.37881	4.44106	1.88195	0.878874	27.0371	1.674	27.0371	0.278186	7.91802
S3	G13	3	5.44402	3.42848	2.01554	0.703532	281.413	519.075	2.7851	0.76768	0.62977	1.83132	4.43625	4.57261	4.20732	1.82462	0.811393	37.023	1.46941	37.023	0.37854	6.55407
S3	G14	3	4.49315	3.10085	1.3923	0.525163	210.065	358.568	2.33105	0.694319	0.690128	1.67116	3.797	3.92488	3.66936	1.56665	0.605677	30.9872	1.46287	30.9872	0.225922	6.17548
S3	G15	3	6.63914	3.43114	3.208	0.858642	343.457	826.178	3.63489	0.768274	0.516804	2.23162	5.03514	4.53729	4.52416	2.05725	0.990283	48.3196	1.33163	48.3196	0.665609	6.25919
S3	G16	3	4.64671	3.43963	1.20708	0.602448	240.979	310.868	1.95416	0.770176	0.740229	1.55805	4.04317	3.99293	3.95308	1.67232	0.694812	25.9771	1.59565	25.9771	0.209785	7.16654
S3	G17	3	4.09664	2.79359	1.30305	0.431373	172.549	335.582	2.39277	0.62552	0.681923	1.69127	3.44512	3.75379	3.3219	1.42087	0.497508	31.8077	1.38022	31.8077	0.191631	5.52843
S3	G18	3	6.57732	5.84475	0.732578	1.44903	579.612	188.665	0.837863	1.30871	0.888621	1.29787	6.21104	4.28653	6.18943	2.58568	1.67119	11.1379	2.27898	11.1379	0.197456	15.6142
S3	G19	3	6.87706	5.17965	1.69741	1.34266	537.064	437.145	1.85675	1.15979	0.753178	1.53126	6.02836	6.33993	5.90887	2.49495	1.54851	24.6822	1.97515	24.6822	0.440401	10.9407
S3	G20	3	4.79689	4.75154	0.0453467	0.859126	343.65	11.6784	0.071114	1.06393	0.990547	1.16432	4.77422	4.9846	4.77411	1.99523	0.990841	0.945336	2.16948	0.945336	0.00941137	28.3483

## Sheet: PCA_HID
	1.61028	-4.59456	-0.10547	0.518322	-0.439907	-0.25882	0.0407354	0.192824	-0.0221913	0.0329267	-0.0216332	-0.023413	-0.00562917	0.00463039	-0.00263767	5.84657	2.45226	-0.776262	-0.314321	6.7445	0.676312	1.51591	-1.62531	1.55909	-5.45988	-0.755752	7.64356	4.48682	1.26373	13.6108
	-5.8214	0.163124	-1.12166	1.16987	0.785897	-0.0634295	0.0298051	-0.174352	0.16186	0.104729	6.06327e-05	-0.0130007	0.000371148	0.000406773	0.00133856	-1.02206	7.88246	-2.07664	0.201175	-4.19329	-5.08944	1.66516	15.6428	0.904322	-2.66148	-0.0579164	0.774852	3.39673	-3.35015	0.500052
	-0.248233	-1.10251	0.464209	-0.173809	-0.16725	-0.238909	0.0350348	-0.0899297	0.0364669	0.00684339	-0.00766961	0.00288528	0.00255511	0.000942006	-0.000545918	5.8389	2.47785	-0.703774	-0.381164	6.57817	2.85978	2.61025	-0.886451	4.45628	-5.28348	-3.51302	6.13219	-0.218568	-6.15494	-12.427
	-6.31236	6.70998	-0.0647005	0.482425	-0.479073	-0.418057	0.0999125	0.131378	0.143964	-0.0694931	0.0379982	0.00927165	0.000706035	-0.00471071	-0.00164571	6.08312	0.90357	-1.26504	1.6991	-4.48187	8.68547	3.90093	1.34292	12.8898	2.32322	4.04369	-6.35491	-0.733626	1.43905	2.06345
	2.33554	0.347112	1.88683	0.0552195	-0.327773	-0.312996	0.000684629	-0.144119	-0.0110014	0.0295847	0.00304001	0.00386475	-0.00256253	-0.000597748	0.000758063	-3.04296	6.93014	-1.96057	-1.00598	-3.28092	-4.94318	15.2825	-7.44338	-1.07041	0.415716	0.0801234	-0.101574	-1.06045	1.09717	-0.197488
	2.26989	-0.750618	-0.508095	0.110004	-0.161855	-0.18791	0.0136611	-0.0772689	-0.0524635	0.01039	-0.00292889	0.0139468	0.000139722	-0.00115752	-0.000263056	-6.11593	-0.743414	1.69782	-2.08265	4.1525	3.20485	2.16838	2.55576	0.854188	-4.22261	2.5814	-0.733531	-4.33478	0.973322	0.758724
	3.23897	-3.24203	-0.888689	0.664649	-0.487969	-0.162864	-0.00390013	0.0156246	-0.0975639	-0.0229216	-0.0116796	-0.0199908	-0.00729302	-0.00628007	-0.000787606	-6.10513	-0.809226	0.775529	-1.93771	3.48302	-7.76914	-2.7056	-2.28835	11.5535	0.227358	-10.0247	-4.59664	1.80361	-1.0864	1.75479
	-2.33152	-0.036245	-1.09579	-0.456624	0.0516906	-0.188438	0.0650922	-0.0914631	0.054212	-0.036801	-0.00203119	-0.00539645	-0.00147162	0.0015029	-0.000507557	-0.40182	8.01234	-1.6643	-2.07709	0.215037	5.66196	-3.1059	-0.254573	-2.70178	-3.43802	-6.51834	-3.37361	4.06902	13.2025	-3.59045
	3.63371	-0.15743	0.0185437	0.266574	-0.141406	-0.223358	-0.00322739	-0.0941603	-0.0745672	-0.00876173	-0.00223862	0.0113991	-0.00398814	-0.00232822	0.00112155	2.58283	4.88974	18.8428	0.441497	-1.72278	-0.900313	-0.160973	-0.529869	0.273776	0.08431	0.0227326	-0.0863806	-0.0226675	-0.00191688	0.00735749
	0.901878	0.553027	-0.578999	-0.266088	-0.0439833	-0.220888	0.0423442	-0.0664292	-0.0221721	0.02975	0.00648891	0.0109918	0.000127646	0.000983962	-0.000262152	-1.11642	7.88099	-1.74539	-3.24587	-1.90382	6.0902	-3.41589	-0.636946	-1.48143	6.36485	-7.11347	2.98797	-10.1267	-6.02676	4.37808
	-1.7948	-1.68821	0.0994143	-0.26715	0.0352782	-0.231316	0.0541695	-0.0568727	0.0820873	-0.0233184	-0.0182408	-0.00328781	0.000759171	0.0010213	0.000763732	-0.674083	7.95017	-2.52016	-1.93619	-0.327464	-6.0536	-8.63293	-4.72706	5.06268	-1.41961	10.9598	3.26876	-3.75466	2.57873	-1.84939
	1.72019	-0.892283	-0.446523	0.0441393	-0.171773	-0.189552	0.0192588	-0.0763635	-0.0371246	0.0148414	-0.00336117	0.0131364	0.00144603	-0.000586026	-0.000628923	6.11593	0.743414	-1.69782	2.08265	-4.1525	-3.20485	-2.16838	-2.55576	-0.854188	4.22261	-2.5814	0.733531	4.33478	-0.973322	-0.758724
	0.743388	-0.868632	-0.523228	-0.107034	-0.130044	-0.190167	0.0318474	-0.0744696	-0.0124389	0.0155176	-0.00345592	0.0119376	0.00280786	0.00047631	-0.000948654	-5.14229	4.41389	-0.241898	-2.75991	-0.0970504	5.83195	-2.43265	-4.91108	-2.17944	-2.27342	3.69766	-5.60992	10.6515	-10.1494	0.903393
	1.00447	-1.32016	-0.436434	-0.0105001	-0.174008	-0.187997	0.0265818	-0.0660421	-0.0165417	0.0143628	-0.00611522	0.011128	0.00316322	-1.80966e-05	-0.00105399	6.11593	0.743414	-1.69782	2.08265	-4.1525	-3.20485	-2.16838	-2.55576	-0.854188	4.22261	-2.5814	0.733531	4.33478	-0.973322	-0.758724
	4.13405	2.46048	-0.71206	-0.154547	0.491467	-0.318704	0.0542597	0.0737968	-0.0908188	0.0588335	0.0208237	-0.00422731	0.00158132	-0.000837428	0.0021371	5.4442	3.45674	-0.510771	-3.86307	12.4051	-3.19881	1.65737	2.84696	-3.16102	8.51235	2.98229	-8.16667	-0.390329	0.0161805	-0.256652
	-1.28026	-0.183939	0.170155	-0.362417	-0.092616	-0.239592	0.0476941	-0.112295	0.0525992	-0.0110506	-0.00240764	-0.00311725	-0.000252763	0.00136914	-0.0003032	-4.80957	4.33772	-0.37118	17.6141	5.13172	1.45614	-0.505915	-0.431726	0.192763	2.92371	0.1959	0.329507	0.172632	0.0321568	-0.0237321
	-1.31075	-3.44649	-0.0307836	-0.100752	0.0872822	-0.252588	0.0679183	0.0970397	0.0871367	-0.0091408	-0.0355453	0.00596342	-0.000168523	0.00444644	0.00123979	-6.09786	-0.943106	1.49094	-4.17875	1.40328	3.38367	1.76975	2.0814	3.73502	11.2049	2.10452	10.0479	7.08217	3.42231	-2.14555
	-0.519364	2.93712	-0.854092	-0.680673	0.016597	-0.317664	0.0923189	0.0494037	-0.00528868	0.037916	0.0255979	-0.009741	-0.00424642	-0.000688124	0.000722891
	7.64492	2.48951	0.539393	0.422038	0.812745	-0.394223	0.0030598	0.0123134	-0.115108	-0.114268	0.00702565	-0.0135897	0.00662936	0.00317769	0.00134084
	-1.59178	-1.17904	-0.342518	-0.313862	0.00853306	-0.207951	0.0534091	-0.0758402	0.0602578	-0.0199036	-0.011396	-0.000969596	0.00145145	0.00110032	-8.2756e-05
	-0.37692	-3.08619	0.699389	0.0574948	-0.197506	0.114552	0.113856	0.105884	0.000597024	0.0199878	0.0332515	-0.00762805	0.00116281	0.00603121	0.000238406
	-2.44261	0.939234	-0.552795	-0.417633	-0.107518	0.208536	0.101495	-0.0692787	-0.0871125	-0.0271442	-0.00359454	-0.00518508	0.000906779	0.00166133	-0.000673893
	-3.28339	-2.22844	0.757059	-0.0293193	0.306925	0.0817059	0.095212	0.0354048	-0.050675	-0.0180248	0.00716353	0.00665639	-0.00348688	-0.00172162	-0.00036145
	-6.10302	6.08491	0.112513	0.631626	-0.40433	0.0937104	0.0796553	0.0717952	-0.151531	-0.00364437	-0.0374716	0.00819717	0.00678341	0.00208245	0.00214247
	2.59817	2.36497	2.13782	-0.1175	-0.279469	0.138627	0.106037	-0.065903	0.0636293	0.0340543	-0.00369708	-0.00443134	-0.00229711	0.000330353	0.00105157
	2.90038	0.805332	0.154646	0.0678235	-0.195615	0.267506	0.108434	-0.0491367	0.0515333	0.00161858	0.00256169	0.00181889	-0.000949133	0.00111084	0.0010599
	-0.0923833	-1.95814	-0.102546	-0.0290244	-0.215614	0.211488	0.105742	0.00939978	-0.014303	0.0127849	0.0259988	-0.00524081	0.0049163	0.00314355	0.000203102
	4.50444	-0.141866	-0.718925	0.447359	-0.184416	0.345208	0.103815	-0.0457626	0.0837212	-0.0708329	0.00523337	-0.00787242	-0.00569485	-0.000254656	0.00212511
	4.47771	1.51311	-0.711606	0.14798	0.13664	0.306439	0.130251	0.015082	0.0870232	-0.0372023	-0.0112208	0.0075732	0.000256099	-0.000407036	-0.00128164
	-5.1425	0.957955	0.359494	0.635824	0.319237	0.197512	0.0453422	-0.161747	-0.114121	0.0503951	0.00121217	-0.00922328	0.00247193	-0.00122008	-0.0018485
	-3.93546	-2.51768	0.889253	0.269448	0.563695	0.0641251	0.0897463	0.0695193	-0.0479042	0.0100508	0.00272951	0.0182717	-0.00710465	-0.00263257	-5.20409e-05
	3.0686	-0.290371	-0.501509	0.23418	-0.253517	0.314898	0.104109	-0.0452571	0.048035	-0.0164925	0.011422	-0.00392512	-0.00160268	0.00114759	0.00192757
	-0.948663	0.0200467	-0.215127	-0.301574	-0.16732	0.2217	0.102422	-0.0618118	-0.0448087	-0.000979162	0.00712343	-0.000706431	0.00331051	0.00209631	-0.000318244
	-2.07396	-3.13424	0.23795	-0.102357	0.156059	0.0950309	0.117507	0.126646	-0.0301897	-0.0107172	0.0167377	0.0101206	-0.0017503	0.00330323	-0.000516027
	3.57394	1.76899	-0.777179	-0.0298415	0.11326	0.290341	0.135806	0.0320278	0.0596578	-0.0008258	-0.0109196	0.00903114	0.00120164	-0.000347322	-0.000960664
	-3.74286	-0.954537	0.418286	-0.0279941	0.232723	0.137956	0.0803353	-0.0652332	-0.0798326	-0.0199651	0.00454427	-0.00501442	-0.000568267	-0.00274154	-0.00091423
	-3.24677	-2.95117	0.321763	-0.0173493	0.414946	0.0762796	0.108744	0.114299	-0.0456936	-0.0186236	0.0059004	0.0172061	-0.00585665	-9.17857e-05	-0.000298952
	-0.169818	4.3764	-0.388489	-0.712534	-0.0854704	0.118149	0.166752	0.177389	-0.0463013	0.0450167	-0.0252828	-0.00909813	-1.46016e-05	-0.00463902	0.00149195
	4.38577	3.60721	1.21266	-0.136124	0.223156	0.143276	0.150008	0.081643	0.101813	0.0311826	-0.0176746	-0.0057354	0.00336016	-0.00363961	-0.00267059
	-3.25542	0.672041	0.670344	-0.249986	-0.0796972	0.143271	0.0799172	-0.120839	-0.0847655	-0.0317116	-0.000171612	-0.0137839	-0.000673517	4.73868e-05	-0.000691574
	0.571265	-3.90416	0.325623	0.253022	-0.256533	-0.0181408	-0.0667435	0.223896	0.0238374	0.0245221	0.00954409	-0.00844401	0.00995538	-0.00431409	0.000860555
	-3.8519	0.261366	-0.785422	-0.239082	0.194382	0.118882	-0.181174	-0.065186	-7.2483e-05	-0.0448006	-0.00262869	-0.0146844	-0.00229467	-0.000902682	-0.000324468
	-1.57728	-1.8192	0.635593	-0.191883	0.013045	0.0252396	-0.128929	0.00780889	0.0313617	-0.00991467	-0.000822455	-0.00225737	0.00400243	-0.00195885	0.000411736
	-6.15253	6.15234	0.0866442	0.609793	-0.318317	0.0109374	-0.278065	0.119687	0.00577356	-0.0170216	-0.00212514	0.00519958	-0.00400501	0.0056464	-0.00017754
	2.53515	1.2214	2.05539	-0.0157737	-0.237628	0.00145	-0.170171	-0.0854485	0.0260721	0.0377759	0.0050449	0.000899582	-0.00396943	0.00064108	0.000838715
	2.63013	-0.0947114	-0.148012	0.101472	-0.119529	0.119936	-0.147822	-0.0372789	-0.00577855	0.0116112	0.00310678	0.00967375	-0.00097393	-0.000347272	0.000284713
	1.55222	-2.68953	-0.459001	0.269732	-0.286168	0.105309	-0.108867	0.0546808	-0.00761005	0.0149965	0.011624	-0.00629309	0.00429773	-0.00166897	-3.56636e-05
	1.21064	-0.229293	-0.872744	-0.11494	-0.048118	0.145811	-0.143423	-0.0151497	-0.0156528	0.0209451	0.00347327	0.0125647	0.00210955	0.000598798	-0.000511739
	4.12809	0.573421	-0.276982	0.224415	0.0513049	0.118851	-0.14736	-0.0238879	-0.00362223	-0.0166549	-0.00241664	0.0108593	-0.00411814	-0.00028384	0.000278287
	-1.82413	0.478458	-0.0674157	-0.409241	-0.041385	0.0813858	-0.168639	-0.0562193	0.000348601	-0.0141724	0.00142707	-0.00562621	-0.000815268	0.000855875	-0.000494318
	-2.65593	-2.26334	0.535171	-0.165199	0.238733	0.00637005	-0.12037	0.0473723	0.0455629	-0.0269557	-0.00910622	-0.00171737	0.000612687	-0.00345955	0.00169487
	2.45416	-0.723505	-0.446862	0.155391	-0.160123	0.137188	-0.141313	-0.0288641	-0.0106529	0.00659781	0.00454374	0.0081484	0.000317128	-0.001045	0.000265199
	-0.0602313	-0.567358	-0.336837	-0.210231	-0.084153	0.110685	-0.145668	-0.0294195	-0.00341284	0.0130154	0.00414086	0.00616958	0.00372905	0.000248964	-0.000623424
	-0.379277	-2.34411	-0.0691657	-0.061099	-0.0814179	0.0667897	-0.113462	0.0459925	0.0136426	0.00896416	0.00416164	0.00253617	0.00678506	-0.000833509	-0.000350303
	3.90362	1.96453	-0.698175	-0.0744256	0.362548	0.0908356	-0.136684	0.0680639	-0.00867487	0.0309027	-0.00164397	0.00853374	-0.00185881	0.00128158	-0.000971417
	-2.35867	-0.741559	0.324842	-0.292993	0.0530437	0.0559294	-0.155129	-0.048229	0.019952	-0.0252753	-0.00117088	-0.00818816	0.00131876	-0.00188256	0.000179609
	-2.19768	-3.30889	0.169885	-0.126762	0.270588	-0.0112647	-0.085691	0.153622	0.049349	-0.0197621	-0.0124703	0.00892441	0.000154745	-0.000786775	0.001742
	-0.276657	3.46361	-0.571883	-0.678499	0.0543533	0.0228258	-0.158908	0.132176	-0.0241897	0.0528863	0.00338195	-0.0100127	-0.00724462	0.00137399	0.000461125
	6.03732	2.92648	0.911688	0.127151	0.589494	-0.0185196	-0.136097	0.067454	0.0287134	-0.0101261	-0.00361449	-0.0060958	0.000902586	0.00204965	-0.0029247
	-2.4104	-0.401726	0.215169	-0.321129	0.0378783	0.0646127	-0.161334	-0.0579675	0.0149783	-0.0264979	-0.000627161	-0.009012	0.000597879	-0.00132558	-1.08472e-05

## Sheet: PCA1_HID
	1.61028	-4.59456	-0.10547	0.518322	-0.439907	-0.25882	0.0407354	0.192824	-0.0221913	0.0329267	-0.0216332	-0.023413	-0.00562917	0.00463039	-0.00263767	5.84657	2.45226	-0.776262	-0.314321	6.7445	0.676312	1.51591	-1.62531	1.55909	-5.45988	-0.755752	7.64356	4.48682	1.26373	13.6108
	-5.8214	0.163124	-1.12166	1.16987	0.785897	-0.0634295	0.0298051	-0.174352	0.16186	0.104729	6.06327e-05	-0.0130007	0.000371148	0.000406773	0.00133856	-1.02206	7.88246	-2.07664	0.201175	-4.19329	-5.08944	1.66516	15.6428	0.904322	-2.66148	-0.0579164	0.774852	3.39673	-3.35015	0.500052
	-0.248233	-1.10251	0.464209	-0.173809	-0.16725	-0.238909	0.0350348	-0.0899297	0.0364669	0.00684339	-0.00766961	0.00288528	0.00255511	0.000942006	-0.000545918	5.8389	2.47785	-0.703774	-0.381164	6.57817	2.85978	2.61025	-0.886451	4.45628	-5.28348	-3.51302	6.13219	-0.218568	-6.15494	-12.427
	-6.31236	6.70998	-0.0647005	0.482425	-0.479073	-0.418057	0.0999125	0.131378	0.143964	-0.0694931	0.0379982	0.00927165	0.000706035	-0.00471071	-0.00164571	6.08312	0.90357	-1.26504	1.6991	-4.48187	8.68547	3.90093	1.34292	12.8898	2.32322	4.04369	-6.35491	-0.733626	1.43905	2.06345
	2.33554	0.347112	1.88683	0.0552195	-0.327773	-0.312996	0.000684629	-0.144119	-0.0110014	0.0295847	0.00304001	0.00386475	-0.00256253	-0.000597748	0.000758063	-3.04296	6.93014	-1.96057	-1.00598	-3.28092	-4.94318	15.2825	-7.44338	-1.07041	0.415716	0.0801234	-0.101574	-1.06045	1.09717	-0.197488
	2.26989	-0.750618	-0.508095	0.110004	-0.161855	-0.18791	0.0136611	-0.0772689	-0.0524635	0.01039	-0.00292889	0.0139468	0.000139722	-0.00115752	-0.000263056	-6.11593	-0.743414	1.69782	-2.08265	4.1525	3.20485	2.16838	2.55576	0.854188	-4.22261	2.5814	-0.733531	-4.33478	0.973322	0.758724
	3.23897	-3.24203	-0.888689	0.664649	-0.487969	-0.162864	-0.00390013	0.0156246	-0.0975639	-0.0229216	-0.0116796	-0.0199908	-0.00729302	-0.00628007	-0.000787606	-6.10513	-0.809226	0.775529	-1.93771	3.48302	-7.76914	-2.7056	-2.28835	11.5535	0.227358	-10.0247	-4.59664	1.80361	-1.0864	1.75479
	-2.33152	-0.036245	-1.09579	-0.456624	0.0516906	-0.188438	0.0650922	-0.0914631	0.054212	-0.036801	-0.00203119	-0.00539645	-0.00147162	0.0015029	-0.000507557	-0.40182	8.01234	-1.6643	-2.07709	0.215037	5.66196	-3.1059	-0.254573	-2.70178	-3.43802	-6.51834	-3.37361	4.06902	13.2025	-3.59045
	3.63371	-0.15743	0.0185437	0.266574	-0.141406	-0.223358	-0.00322739	-0.0941603	-0.0745672	-0.00876173	-0.00223862	0.0113991	-0.00398814	-0.00232822	0.00112155	2.58283	4.88974	18.8428	0.441497	-1.72278	-0.900313	-0.160973	-0.529869	0.273776	0.08431	0.0227326	-0.0863806	-0.0226675	-0.00191688	0.00735749
	0.901878	0.553027	-0.578999	-0.266088	-0.0439833	-0.220888	0.0423442	-0.0664292	-0.0221721	0.02975	0.00648891	0.0109918	0.000127646	0.000983962	-0.000262152	-1.11642	7.88099	-1.74539	-3.24587	-1.90382	6.0902	-3.41589	-0.636946	-1.48143	6.36485	-7.11347	2.98797	-10.1267	-6.02676	4.37808
	-1.7948	-1.68821	0.0994143	-0.26715	0.0352782	-0.231316	0.0541695	-0.0568727	0.0820873	-0.0233184	-0.0182408	-0.00328781	0.000759171	0.0010213	0.000763732	-0.674083	7.95017	-2.52016	-1.93619	-0.327464	-6.0536	-8.63293	-4.72706	5.06268	-1.41961	10.9598	3.26876	-3.75466	2.57873	-1.84939
	1.72019	-0.892283	-0.446523	0.0441393	-0.171773	-0.189552	0.0192588	-0.0763635	-0.0371246	0.0148414	-0.00336117	0.0131364	0.00144603	-0.000586026	-0.000628923	6.11593	0.743414	-1.69782	2.08265	-4.1525	-3.20485	-2.16838	-2.55576	-0.854188	4.22261	-2.5814	0.733531	4.33478	-0.973322	-0.758724
	0.743388	-0.868632	-0.523228	-0.107034	-0.130044	-0.190167	0.0318474	-0.0744696	-0.0124389	0.0155176	-0.00345592	0.0119376	0.00280786	0.00047631	-0.000948654	-5.14229	4.41389	-0.241898	-2.75991	-0.0970504	5.83195	-2.43265	-4.91108	-2.17944	-2.27342	3.69766	-5.60992	10.6515	-10.1494	0.903393
	1.00447	-1.32016	-0.436434	-0.0105001	-0.174008	-0.187997	0.0265818	-0.0660421	-0.0165417	0.0143628	-0.00611522	0.011128	0.00316322	-1.80966e-05	-0.00105399	6.11593	0.743414	-1.69782	2.08265	-4.1525	-3.20485	-2.16838	-2.55576	-0.854188	4.22261	-2.5814	0.733531	4.33478	-0.973322	-0.758724
	4.13405	2.46048	-0.71206	-0.154547	0.491467	-0.318704	0.0542597	0.0737968	-0.0908188	0.0588335	0.0208237	-0.00422731	0.00158132	-0.000837428	0.0021371	5.4442	3.45674	-0.510771	-3.86307	12.4051	-3.19881	1.65737	2.84696	-3.16102	8.51235	2.98229	-8.16667	-0.390329	0.0161805	-0.256652
	-1.28026	-0.183939	0.170155	-0.362417	-0.092616	-0.239592	0.0476941	-0.112295	0.0525992	-0.0110506	-0.00240764	-0.00311725	-0.000252763	0.00136914	-0.0003032	-4.80957	4.33772	-0.37118	17.6141	5.13172	1.45614	-0.505915	-0.431726	0.192763	2.92371	0.1959	0.329507	0.172632	0.0321568	-0.0237321
	-1.31075	-3.44649	-0.0307836	-0.100752	0.0872822	-0.252588	0.0679183	0.0970397	0.0871367	-0.0091408	-0.0355453	0.00596342	-0.000168523	0.00444644	0.00123979	-6.09786	-0.943106	1.49094	-4.17875	1.40328	3.38367	1.76975	2.0814	3.73502	11.2049	2.10452	10.0479	7.08217	3.42231	-2.14555
	-0.519364	2.93712	-0.854092	-0.680673	0.016597	-0.317664	0.0923189	0.0494037	-0.00528868	0.037916	0.0255979	-0.009741	-0.00424642	-0.000688124	0.000722891
	7.64492	2.48951	0.539393	0.422038	0.812745	-0.394223	0.0030598	0.0123134	-0.115108	-0.114268	0.00702565	-0.0135897	0.00662936	0.00317769	0.00134084
	-1.59178	-1.17904	-0.342518	-0.313862	0.00853306	-0.207951	0.0534091	-0.0758402	0.0602578	-0.0199036	-0.011396	-0.000969596	0.00145145	0.00110032	-8.2756e-05
	-0.37692	-3.08619	0.699389	0.0574948	-0.197506	0.114552	0.113856	0.105884	0.000597024	0.0199878	0.0332515	-0.00762805	0.00116281	0.00603121	0.000238406
	-2.44261	0.939234	-0.552795	-0.417633	-0.107518	0.208536	0.101495	-0.0692787	-0.0871125	-0.0271442	-0.00359454	-0.00518508	0.000906779	0.00166133	-0.000673893
	-3.28339	-2.22844	0.757059	-0.0293193	0.306925	0.0817059	0.095212	0.0354048	-0.050675	-0.0180248	0.00716353	0.00665639	-0.00348688	-0.00172162	-0.00036145
	-6.10302	6.08491	0.112513	0.631626	-0.40433	0.0937104	0.0796553	0.0717952	-0.151531	-0.00364437	-0.0374716	0.00819717	0.00678341	0.00208245	0.00214247
	2.59817	2.36497	2.13782	-0.1175	-0.279469	0.138627	0.106037	-0.065903	0.0636293	0.0340543	-0.00369708	-0.00443134	-0.00229711	0.000330353	0.00105157
	2.90038	0.805332	0.154646	0.0678235	-0.195615	0.267506	0.108434	-0.0491367	0.0515333	0.00161858	0.00256169	0.00181889	-0.000949133	0.00111084	0.0010599
	-0.0923833	-1.95814	-0.102546	-0.0290244	-0.215614	0.211488	0.105742	0.00939978	-0.014303	0.0127849	0.0259988	-0.00524081	0.0049163	0.00314355	0.000203102
	4.50444	-0.141866	-0.718925	0.447359	-0.184416	0.345208	0.103815	-0.0457626	0.0837212	-0.0708329	0.00523337	-0.00787242	-0.00569485	-0.000254656	0.00212511
	4.47771	1.51311	-0.711606	0.14798	0.13664	0.306439	0.130251	0.015082	0.0870232	-0.0372023	-0.0112208	0.0075732	0.000256099	-0.000407036	-0.00128164
	-5.1425	0.957955	0.359494	0.635824	0.319237	0.197512	0.0453422	-0.161747	-0.114121	0.0503951	0.00121217	-0.00922328	0.00247193	-0.00122008	-0.0018485
	-3.93546	-2.51768	0.889253	0.269448	0.563695	0.0641251	0.0897463	0.0695193	-0.0479042	0.0100508	0.00272951	0.0182717	-0.00710465	-0.00263257	-5.20409e-05
	3.0686	-0.290371	-0.501509	0.23418	-0.253517	0.314898	0.104109	-0.0452571	0.048035	-0.0164925	0.011422	-0.00392512	-0.00160268	0.00114759	0.00192757
	-0.948663	0.0200467	-0.215127	-0.301574	-0.16732	0.2217	0.102422	-0.0618118	-0.0448087	-0.000979162	0.00712343	-0.000706431	0.00331051	0.00209631	-0.000318244
	-2.07396	-3.13424	0.23795	-0.102357	0.156059	0.0950309	0.117507	0.126646	-0.0301897	-0.0107172	0.0167377	0.0101206	-0.0017503	0.00330323	-0.000516027
	3.57394	1.76899	-0.777179	-0.0298415	0.11326	0.290341	0.135806	0.0320278	0.0596578	-0.0008258	-0.0109196	0.00903114	0.00120164	-0.000347322	-0.000960664
	-3.74286	-0.954537	0.418286	-0.0279941	0.232723	0.137956	0.0803353	-0.0652332	-0.0798326	-0.0199651	0.00454427	-0.00501442	-0.000568267	-0.00274154	-0.00091423
	-3.24677	-2.95117	0.321763	-0.0173493	0.414946	0.0762796	0.108744	0.114299	-0.0456936	-0.0186236	0.0059004	0.0172061	-0.00585665	-9.17857e-05	-0.000298952
	-0.169818	4.3764	-0.388489	-0.712534	-0.0854704	0.118149	0.166752	0.177389	-0.0463013	0.0450167	-0.0252828	-0.00909813	-1.46016e-05	-0.00463902	0.00149195
	4.38577	3.60721	1.21266	-0.136124	0.223156	0.143276	0.150008	0.081643	0.101813	0.0311826	-0.0176746	-0.0057354	0.00336016	-0.00363961	-0.00267059
	-3.25542	0.672041	0.670344	-0.249986	-0.0796972	0.143271	0.0799172	-0.120839	-0.0847655	-0.0317116	-0.000171612	-0.0137839	-0.000673517	4.73868e-05	-0.000691574
	0.571265	-3.90416	0.325623	0.253022	-0.256533	-0.0181408	-0.0667435	0.223896	0.0238374	0.0245221	0.00954409	-0.00844401	0.00995538	-0.00431409	0.000860555
	-3.8519	0.261366	-0.785422	-0.239082	0.194382	0.118882	-0.181174	-0.065186	-7.2483e-05	-0.0448006	-0.00262869	-0.0146844	-0.00229467	-0.000902682	-0.000324468
	-1.57728	-1.8192	0.635593	-0.191883	0.013045	0.0252396	-0.128929	0.00780889	0.0313617	-0.00991467	-0.000822455	-0.00225737	0.00400243	-0.00195885	0.000411736
	-6.15253	6.15234	0.0866442	0.609793	-0.318317	0.0109374	-0.278065	0.119687	0.00577356	-0.0170216	-0.00212514	0.00519958	-0.00400501	0.0056464	-0.00017754
	2.53515	1.2214	2.05539	-0.0157737	-0.237628	0.00145	-0.170171	-0.0854485	0.0260721	0.0377759	0.0050449	0.000899582	-0.00396943	0.00064108	0.000838715
	2.63013	-0.0947114	-0.148012	0.101472	-0.119529	0.119936	-0.147822	-0.0372789	-0.00577855	0.0116112	0.00310678	0.00967375	-0.00097393	-0.000347272	0.000284713
	1.55222	-2.68953	-0.459001	0.269732	-0.286168	0.105309	-0.108867	0.0546808	-0.00761005	0.0149965	0.011624	-0.00629309	0.00429773	-0.00166897	-3.56636e-05
	1.21064	-0.229293	-0.872744	-0.11494	-0.048118	0.145811	-0.143423	-0.0151497	-0.0156528	0.0209451	0.00347327	0.0125647	0.00210955	0.000598798	-0.000511739
	4.12809	0.573421	-0.276982	0.224415	0.0513049	0.118851	-0.14736	-0.0238879	-0.00362223	-0.0166549	-0.00241664	0.0108593	-0.00411814	-0.00028384	0.000278287
	-1.82413	0.478458	-0.0674157	-0.409241	-0.041385	0.0813858	-0.168639	-0.0562193	0.000348601	-0.0141724	0.00142707	-0.00562621	-0.000815268	0.000855875	-0.000494318
	-2.65593	-2.26334	0.535171	-0.165199	0.238733	0.00637005	-0.12037	0.0473723	0.0455629	-0.0269557	-0.00910622	-0.00171737	0.000612687	-0.00345955	0.00169487
	2.45416	-0.723505	-0.446862	0.155391	-0.160123	0.137188	-0.141313	-0.0288641	-0.0106529	0.00659781	0.00454374	0.0081484	0.000317128	-0.001045	0.000265199
	-0.0602313	-0.567358	-0.336837	-0.210231	-0.084153	0.110685	-0.145668	-0.0294195	-0.00341284	0.0130154	0.00414086	0.00616958	0.00372905	0.000248964	-0.000623424
	-0.379277	-2.34411	-0.0691657	-0.061099	-0.0814179	0.0667897	-0.113462	0.0459925	0.0136426	0.00896416	0.00416164	0.00253617	0.00678506	-0.000833509	-0.000350303
	3.90362	1.96453	-0.698175	-0.0744256	0.362548	0.0908356	-0.136684	0.0680639	-0.00867487	0.0309027	-0.00164397	0.00853374	-0.00185881	0.00128158	-0.000971417
	-2.35867	-0.741559	0.324842	-0.292993	0.0530437	0.0559294	-0.155129	-0.048229	0.019952	-0.0252753	-0.00117088	-0.00818816	0.00131876	-0.00188256	0.000179609
	-2.19768	-3.30889	0.169885	-0.126762	0.270588	-0.0112647	-0.085691	0.153622	0.049349	-0.0197621	-0.0124703	0.00892441	0.000154745	-0.000786775	0.001742
	-0.276657	3.46361	-0.571883	-0.678499	0.0543533	0.0228258	-0.158908	0.132176	-0.0241897	0.0528863	0.00338195	-0.0100127	-0.00724462	0.00137399	0.000461125
	6.03732	2.92648	0.911688	0.127151	0.589494	-0.0185196	-0.136097	0.067454	0.0287134	-0.0101261	-0.00361449	-0.0060958	0.000902586	0.00204965	-0.0029247
	-2.4104	-0.401726	0.215169	-0.321129	0.0378783	0.0646127	-0.161334	-0.0579675	0.0149783	-0.0264979	-0.000627161	-0.009012	0.000597879	-0.00132558	-1.08472e-05

## Sheet: PCA_HID1
	-2.55048	0.176344	-1.36205	-1.05756	0.0346302	1.72282	-0.963793	-1.03063	-0.356647	-0.270555	-2.83599	-0.491264	1.74229	-3.18441	-0.246651	0.00260208	0.00344223	0.104011	-0.0617459	-0.0304162	1.61647	0.0503977	1.02521	1.12565	-0.571057	0.0752584	0.0697381	0.0194875	-0.0069968	0.002082
	1.60604	0.82921	1.87674	1.44731	-1.43718	-1.64616	-0.061947	-1.06384	1.62709	4.39058	-0.594575	1.00362	2.76296	-1.49432	0.224294	0.00109458	-0.00107764	-0.0578638	0.107969	0.15133	-0.747515	1.67627	1.34947	-0.109241	0.202036	0.0150501	-0.073347	-0.00656998	-0.0150311	-0.000139712
	-0.258516	0.513436	0.930536	0.902795	-0.704992	-0.454372	-0.575252	-0.110306	0.092143	-1.09418	-0.713196	-0.474674	-0.474932	-0.415221	-0.415449	-0.00623922	0.00260569	-0.0148247	0.022252	-0.0674785	-0.552622	-1.42473	1.48136	-0.71767	-0.466407	-0.135813	-0.013919	-0.000141524	0.00637214	0.00449374
	-0.220375	-1.11144	-0.195797	0.759678	0.551171	-1.92868	2.3113	0.594444	-1.34834	0.666356	-3.90776	2.68707	-1.61639	2.24778	-2.0836	-0.00176836	0.0266886	-0.296417	0.0753335	-0.694747	0.532847	-0.234386	0.372812	-0.0930953	1.8103	-0.965927	-0.0993823	0.0461462	0.0249509	0.00554282
	0.126702	-0.246466	-0.0674411	1.80333	-1.73781	-0.334151	-1.28616	1.91071	-0.374946	-1.54647	-0.91043	-0.164928	0.546827	0.377185	0.779249	0.0210576	0.0662808	0.00603561	-0.279014	0.627997	-0.893918	-0.602475	0.194323	1.51836	0.862758	0.729135	0.0411678	0.159204	0.0265203	-0.0146449
	-0.535058	0.0553	-0.0645744	1.06579	-0.907435	0.750281	0.305979	-0.407896	0.705863	-0.325454	-0.349626	-1.07317	-0.157569	1.24657	-0.00189248	0.0177941	0.0191433	0.400231	-0.422182	0.490864	0.760295	0.00633874	0.2031	-1.04618	0.778692	1.52652	0.22646	0.0542445	-0.0311735	-0.0241643
	-0.400372	-3.82159	-1.89977	0.0468065	-1.1183	2.40347	0.0646645	-1.05005	0.0551821	0.378606	-1.50315	-0.841932	1.00203	-0.61233	-0.584323	0.0224425	-0.0772226	0.225556	1.48315	1.5733	0.290073	-0.137063	-0.0124813	-0.135979	0.218549	-0.459479	-0.288052	-0.123348	-0.274356	0.00460322
	-0.555245	-0.515064	0.542647	0.78185	0.256954	-0.90408	0.950525	-1.59207	0.863664	-0.641459	0.0185784	0.654451	-1.0898	-1.19445	0.121161	-0.0399146	0.248883	-0.445261	-1.46512	1.26404	0.176126	0.0688374	-0.0187184	-0.234348	-0.0843233	-0.915546	0.0437931	0.446941	0.376796	-0.0112577
	-0.0650039	-1.15319	-0.636877	1.14543	-1.2011	0.804144	-0.0391185	0.472853	0.79858	-0.250171	-0.472552	-0.905137	-0.120929	1.41423	1.25748	0.0871806	-0.019873	1.76274	-0.216963	-0.0103243	-0.179464	0.0377903	0.0133293	0.0772845	0.093619	-0.622885	1.27191	0.0215905	-0.246584	-0.0910446
	-0.505346	0.958302	-0.0246156	1.32584	-0.255339	-0.155173	0.75388	-0.513517	0.86198	-0.898966	-0.051191	-0.237173	0.203456	0.75796	0.114661	0.118303	0.892675	0.271825	0.432201	-0.2447	-0.00166077	0.0312097	-0.0309874	-0.0493144	-0.0865627	0.0978628	-0.273769	2.00715	0.0731814	-0.156435
	0.344268	-0.377641	1.50605	0.209369	-0.0173595	-0.932207	-0.599043	-0.769364	0.486242	-0.758762	-0.797124	-0.315206	-0.820279	-1.13734	0.68112	0.434742	0.488834	-1.01393	0.588216	0.0718086	0.0255071	0.00734856	0.00422778	-0.033405	-0.0234184	0.133097	1.66979	-0.0603439	0.721705	-0.382519
	-0.608132	0.418427	0.16891	1.04632	-0.844612	0.581788	0.236305	-0.497769	0.590149	-0.462229	-0.381266	-1.03339	-0.205846	0.998674	-0.356314	-0.74374	0.635818	0.62776	0.208502	-0.031903	-0.00771776	-0.00242563	0.00599151	0.0220666	0.0461075	0.0154342	-0.377345	-0.451535	1.82041	0.476652
	-0.681741	0.88189	0.497261	0.994728	-0.583774	0.216398	0.308897	-0.755599	0.596111	-0.62816	-0.302794	-0.855217	-0.384993	0.609714	-0.62254	1.1774	1.09989	0.339058	-0.185058	-0.0259553	-0.00152154	-0.00661154	0.00111087	0.0131081	0.000987302	-0.0445377	-0.663575	-0.752163	0.000844243	-1.23778
	-0.656423	0.720116	0.488799	0.861224	-0.707913	0.436526	0.115836	-0.71631	0.482866	-0.534732	-0.491089	-1.06304	-0.366039	0.594484	-0.800971	-0.652513	1.6	-0.219821	-0.064866	0.00425856	-0.00243074	0.00120244	-0.00511855	0.000395376	-0.0118741	0.00910624	0.23801	-0.487487	-1.05385	0.918053
	2.14164	0.919193	-1.85182	0.660321	0.9807	-0.246148	0.9713	0.406367	2.588	-0.42161	-0.144085	-0.195756	1.69585	0.79941	0.505399	1.64548	-0.0513612	0.0901278	-0.0214948	-0.000187292	-0.000522657	0.00225548	-0.00118008	-0.00744824	-0.000666576	-0.010206	-0.0884395	0.0212132	0.234376	1.58243
	-0.289562	-0.0713218	0.703963	1.08277	-0.402192	-0.948885	-0.0780244	-0.358809	0.264212	-1.19099	-0.374122	0.348237	-0.645049	-0.956181	0.0536025
	-0.458605	0.829601	1.92584	-1.00821	0.741958	-0.426794	-1.05495	-1.18202	0.643903	-0.454711	-1.76228	-1.19412	-0.484146	-1.10788	2.06014
	0.66488	-0.23547	-1.27221	1.18582	1.20144	-1.05747	1.78772	-0.625985	0.934344	-1.70394	-0.381938	1.45966	1.55959	0.0107065	0.370125
	1.74701	0.317947	-2.69993	-0.655247	0.466456	-0.178331	-0.63041	2.43583	3.64049	0.673147	-0.639846	-0.626165	-3.33907	-1.28255	0.267229
	-0.0830296	-0.0531431	1.16475	0.519661	-0.0632544	-0.743648	-0.0308878	-1.03963	0.596037	-0.739894	-0.434846	-0.202437	-0.921411	-0.87439	0.0488622
	0.345584	2.52124	-1.44646	0.427816	1.14622	0.840149	-1.37518	-0.161017	-1.27753	-0.232	-0.466826	1.99459	0.106706	-0.90826	0.352935
	-0.430045	-0.0169154	-0.714046	0.74264	0.84414	-0.0772544	0.857823	-0.746597	-0.850126	-0.253563	1.57517	-0.774607	-1.05864	-1.03806	-0.234516
	-0.697481	-0.806098	-0.75553	0.369419	1.21119	-0.77372	-1.67877	-0.188746	-0.382642	0.507969	0.484238	0.0610711	-0.0440133	1.07	0.134605
	1.15075	1.13953	-0.527576	-0.350706	0.182653	-0.749289	1.78773	0.897189	-2.48574	1.69602	-0.936675	-4.31492	-0.962048	-0.114057	1.37218
	0.493003	-0.174352	1.22079	1.12275	0.102278	0.0583911	-0.900931	2.79098	-1.53284	-1.00339	0.015347	0.399884	0.924579	-0.761352	0.889369
	0.430655	0.184338	1.01157	0.797062	0.425661	1.2705	0.231024	0.837039	-0.719342	0.270389	0.458231	0.650874	-0.157502	-0.228228	0.938144
	1.02683	1.94553	-0.760989	0.786912	0.730759	1.08242	-0.332219	-0.568071	-1.03991	0.0166001	0.463151	1.0671	-0.403653	-0.490843	-0.554758
	0.864152	-1.91835	0.647113	0.284167	0.449857	2.38059	0.594401	0.282923	-0.234556	1.44235	0.158585	1.82758	-1.19726	-0.724094	1.94714
	-1.11091	-0.441213	1.88012	-0.175006	1.36287	1.50522	0.877535	0.606333	0.550079	1.19485	0.379329	0.204427	-1.01238	0.0101026	-0.577006
	-0.276894	0.207603	-1.20754	1.55509	-0.826401	-0.991753	-0.631403	0.301705	-0.703221	2.48624	1.37606	-1.26584	1.08375	-0.744218	-1.94463
	-1.32962	-0.899303	-0.455058	0.302505	1.238	-1.09604	-2.18227	-0.0330024	0.0273366	1.47125	0.222966	-0.230186	1.01075	2.24728	0.96275
	1.1705	-0.134966	0.438768	0.735541	0.361069	1.95914	0.485424	0.0882768	-0.660969	0.780232	0.430082	1.31557	-0.443014	-0.427884	1.36884
	0.14811	1.02653	-0.249195	0.959118	0.633625	0.399876	0.344619	-0.414054	-0.942795	-0.297001	1.2489	-0.1596	-0.738486	-0.498535	-0.42231
	-1.11821	1.31106	-0.932777	-0.000811406	1.8155	0.0499713	-1.29747	-0.794428	-0.435731	0.167736	0.0269867	0.788292	-0.401994	0.707167	0.543598
	-0.791082	0.170865	1.75222	-0.00371728	1.50965	1.23522	1.08719	0.367024	0.382287	0.776748	0.584437	-0.26236	-0.192888	0.256443	-0.5438
	-0.145933	-1.22056	-0.995083	0.811003	0.56183	-0.792058	-0.973332	-0.245471	-0.53147	0.681679	1.17837	-0.393121	-0.255055	0.0549618	-1.0084
	-1.57631	-0.271405	-0.664546	-0.0640399	1.84845	-0.600855	-1.59531	-0.723916	0.00723302	0.767024	0.23211	0.134605	-0.011496	1.73558	1.0396
	1.46639	-1.39821	0.487041	-0.543005	2.71036	-0.256494	1.89893	0.32263	-0.663742	-1.22198	0.264486	-2.09889	2.05289	-0.11284	0.168376
	-0.701812	-0.583839	2.13301	-0.28198	1.78703	0.0246909	-0.145295	2.63229	0.151013	-0.177767	-0.265014	-0.46377	1.13244	-0.609328	-2.77569
	-0.140315	-0.994505	-1.11233	1.07205	0.19333	-0.739369	-0.376908	0.251855	-1.24984	-0.261148	1.33085	-0.398274	-0.809141	-1.42701	-0.488904
	2.89921	0.514982	-0.164411	-1.85856	0.254708	1.11283	-1.16005	-0.547545	-0.785756	-0.253664	-1.64521	-0.112807	0.727938	0.891858	-2.07546
	-0.022044	-1.55244	-0.43541	-1.16233	-0.767948	-1.08926	0.691212	-1.1582	0.131394	0.356514	1.48858	0.685127	-0.563302	-1.1134	-0.214142
	1.12231	-0.191895	0.527651	-1.07524	-0.594878	-0.601196	-0.991477	-0.136812	-0.406828	-0.575669	0.274957	0.0736915	-0.319042	0.296498	-0.726781
	-1.64701	1.24356	-1.03452	-2.16866	-1.56806	-1.56844	2.01653	0.893728	-1.90511	1.37853	-1.14425	0.591093	-0.347616	-0.232559	1.60911
	-0.0184972	0.0994319	0.192464	0.0856963	-1.93736	-0.280268	-1.10354	2.44188	-0.932278	-1.22852	0.271391	0.83269	1.1033	0.156749	1.09257
	-0.194699	0.224246	0.186338	-0.43093	-1.25244	0.885624	0.272692	0.284513	0.00915548	0.00737587	0.692585	0.191914	0.20337	1.07065	0.410893
	1.16636	0.348167	-0.527369	-0.860447	-0.816298	1.54896	-0.121318	-0.761763	-0.483203	0.173928	-0.201603	0.390877	0.378193	0.301471	-1.2601
	-0.447821	1.15147	0.278489	-0.609434	-0.81621	0.675702	0.857401	-0.678041	0.214968	-0.0432712	1.10868	-0.102119	0.0564061	1.12168	-0.340901
	-0.814242	-0.517288	0.141002	-0.766821	-1.01125	1.02081	0.395969	0.652492	0.67361	0.485671	0.650132	0.251245	-0.170191	1.02737	1.03882
	-0.340964	-0.183974	-0.174146	-0.755121	-0.893269	-0.751066	0.415272	-0.348152	-0.346213	-0.772694	1.25493	0.592514	-0.3215	-0.597299	-0.152427
	1.4677	-1.35447	0.785481	-1.56373	-0.0923213	-1.04951	-1.2525	-0.410725	0.0172107	-0.124976	0.129462	-0.0365042	-0.160908	0.584268	0.444644
	0.122395	0.122923	0.0882378	-0.488822	-1.21464	1.17537	0.36312	-0.140736	-0.0288061	0.183999	0.627505	0.139223	0.0566022	1.12084	0.048468
	-0.0234771	0.977577	0.285578	-0.613178	-0.904475	0.157911	0.335505	-0.514976	-0.174005	-0.426449	0.994713	0.0175906	-0.183394	0.612237	-0.847612
	0.829595	0.997325	0.341434	-1.06718	-0.477095	0.331642	-0.468046	-0.696934	-0.302302	-0.273248	0.147417	-0.099538	-0.241607	0.624025	-1.40687
	-1.30817	0.878605	0.0266557	-1.2558	0.0419754	0.353318	1.01657	0.483615	1.48532	0.271885	0.95242	0.0818102	0.980264	0.646921	0.0371413
	0.760382	-0.934612	0.1943	-0.937621	-0.82444	-0.938972	-0.422037	-0.281665	-0.30774	-0.51046	0.900675	0.367502	-0.455222	-0.315745	-0.537828
	0.701883	-0.181744	0.945156	-2.07749	0.682909	-0.618458	-1.26259	-0.924467	0.254085	0.0044806	-0.444418	-0.250585	-0.16412	1.04213	1.24076
	-0.493261	-0.0268772	-1.03888	-1.45466	0.481099	-0.843327	1.82909	-0.0480167	0.156945	-1.39371	0.935032	0.850054	2.42868	-0.509694	1.2343
	-1.80294	0.609701	-0.156299	-1.71453	0.0487264	-0.260975	-0.370311	2.60269	1.89138	0.279043	0.237096	0.506277	-0.0393776	-1.0201	-1.66327
	0.503283	-0.90611	0.0583546	-0.889984	-0.87883	-0.949369	-0.203866	-0.320239	-0.316254	-0.537414	1.0384	0.468084	-0.478586	-0.502368	-0.470416

## Sheet: PCA_HID2
	-2.9205	-4.4556	-0.178636	0.467279	-0.589187	-0.320895	-0.0724843	-0.16944	-0.0342794	0.0434159	-0.0130907	0.00216599	0.0166386	-0.000599873	-0.00265526	-5.78839	4.24201	-0.831452	0.484405	7.22326	-0.517769	1.21087	-0.385698	2.08349	-9.08603	-2.23806	2.38896	-3.87315	-6.32578	14.2137
	5.4615	-1.33076	-1.04867	1.20008	0.797567	-0.0902877	0.162945	0.156439	0.145549	0.0897876	0.00453775	-0.00692423	0.000364435	-0.00157431	0.000315234	2.99733	6.9184	-1.67885	0.0541848	-3.93636	-3.57867	-2.40016	-8.20998	-0.83258	-0.24172	-5.70219	-4.63402	-3.81494	0.354372	-0.125743
	-0.160195	-1.26937	0.451338	-0.195489	-0.185877	-0.184455	0.13756	0.0785618	0.0356485	0.00421429	-0.00789478	0.00245323	0.0016628	0.000689934	0.000746001	2.99733	6.9184	-1.67885	0.0541848	-3.93636	-3.57867	-2.40016	-8.20998	-0.83258	-0.24172	-5.70219	-4.63402	-3.81494	0.354372	-0.125743
	8.29965	6.06364	-0.0672772	0.41497	-0.633021	-0.465836	0.00740492	-0.150826	0.151486	-0.0598913	0.0378037	-0.00374503	-0.00705673	0.00425113	-0.0001233	-5.77552	4.261	-0.745751	0.45776	7.22984	1.54161	0.76235	-2.1194	5.4698	-7.3195	-3.54552	5.06805	-1.49868	11.545	-9.58445
	-2.102	0.838966	1.89018	0.00640973	-0.364324	-0.2265	0.172527	0.161331	-0.0145723	0.0166556	0.0061908	0.00338414	-0.00351924	-0.00101754	-0.000369758	-6.40632	2.91183	-1.52279	2.44694	-4.14299	8.86471	-0.550266	-4.39239	14.2701	5.60515	4.69677	-4.57355	1.50269	-2.60207	0.956603
	-2.29544	-0.236961	-0.519725	0.0895177	-0.176256	-0.132326	0.113817	0.0802066	-0.054257	-0.00316752	-0.00267338	0.00794062	-0.00525825	0.000621888	5.22621e-05	4.96435	5.33598	-1.4799	-1.41083	-2.01534	-0.552848	18.9639	-3.21459	0.29905	-0.384922	3.77706	3.01615	2.42046	-0.22777	0.0480457
	-3.93339	-2.64651	-0.926183	0.603818	-0.556401	-0.118987	0.0287186	0.00427962	-0.093132	-0.0068233	-0.00731448	-0.000348327	0.00677909	0.00532188	-0.000556957	6.47111	-2.78725	2.03574	-2.59428	4.78168	2.23863	-1.87138	-5.1794	2.25654	-2.05055	3.03564	0.786691	-1.69911	-3.11892	-1.80182
	2.18273	-0.527874	-1.10217	-0.452558	0.0761348	-0.13806	0.146586	0.0455487	0.064105	-0.0228649	-0.00492851	-0.00305238	0.00270842	-0.0014157	-0.00158488	6.45368	-2.82911	0.993518	-2.68129	3.20531	-7.84925	1.02777	4.30576	12.2967	5.34663	-9.80692	0.902615	4.20803	1.95918	3.6745
	-3.36454	0.692514	0.0173757	0.234109	-0.165506	-0.166113	0.118579	0.104916	-0.0723497	-0.0162133	-0.00271699	0.0079416	-0.00669352	-0.000578695	-0.000428049	2.33697	7.22225	-1.1513	-2.05294	2.24521	7.24343	-2.44332	2.42625	-2.79363	-3.64375	-6.45838	-1.46452	14.3871	-6.6487	-3.53337
	-0.613635	0.877705	-0.589629	-0.267237	-0.0472226	-0.178676	0.127074	0.0544211	-0.0264221	0.0125185	0.00825696	0.00401748	-0.00515343	-0.00149795	-0.000836623	-1.71309	5.28735	20.6038	0.176308	-2.09973	-0.673714	0.453947	0.729601	0.293786	0.122475	0.0463807	-0.0344363	0.0208965	-0.00648544	-0.00160936
	1.07532	-2.26176	0.0847099	-0.275254	0.0172512	-0.212603	0.114291	0.0264802	0.0861528	-0.00906672	-0.0207707	0.00246028	0.00500573	0.000101703	0.00146425	3.08411	6.86078	-1.2391	-3.47899	0.201912	8.22318	-2.33709	3.14705	-2.00793	9.70699	-3.29794	11.8113	-7.52565	-0.155569	1.611
	-1.84458	-0.522238	-0.460279	0.0253341	-0.185444	-0.133865	0.116666	0.0765779	-0.0398065	0.000959546	-0.00298202	0.00712045	-0.00408257	0.00087974	0.000235672	2.62905	7.08771	-2.11421	-2.18728	0.722876	-3.64539	-0.0414903	12.2155	4.21869	-3.18108	4.3403	-6.04907	-7.95164	-5.97066	-7.03468
	-0.944242	-0.72282	-0.538431	-0.118187	-0.136977	-0.138296	0.121843	0.0657637	-0.0151197	0.00290697	-0.00348242	0.00567329	-0.0026792	0.000670635	0.000278643	2.97382	6.90503	-2.02762	-0.244925	-4.07816	-7.50959	-8.00836	-0.475288	2.50768	-2.49199	10.7692	8.20007	6.81455	3.28293	3.18318
	-1.33343	-1.15399	-0.454605	-0.027546	-0.189893	-0.137805	0.111806	0.0620575	-0.0195527	0.00281708	-0.00603496	0.0060858	-0.00179591	0.00150569	0.000675726	-6.47111	2.78725	-2.03574	2.59428	-4.78168	-2.23863	1.87138	5.1794	-2.25654	2.05055	-3.03564	-0.786691	1.69911	3.11892	1.80182
	-2.93466	3.7592	-0.719312	-0.126761	0.437056	-0.402899	0.0318929	-0.0784688	-0.102039	0.0387359	0.0243683	-0.00835014	-0.00389531	-0.00102513	0.00151929	6.63972	2.28943	0.299499	-3.29461	1.76571	7.51466	-0.532007	4.03149	-1.29413	-1.89816	3.00465	-9.23052	-0.00654681	12.5318	8.25794
	1.1061	-0.506071	0.164853	-0.376238	-0.0897201	-0.175894	0.1609	0.0855481	0.0571402	-0.00572615	-0.00336474	-0.00143464	0.00212739	-0.000917827	-0.000691235	-6.47111	2.78725	-2.03574	2.59428	-4.78168	-2.23863	1.87138	5.1794	-2.25654	2.05055	-3.03564	-0.786691	1.69911	3.11892	1.80182
	0.0653346	-3.99083	-0.0756013	-0.104672	0.00564255	-0.321546	0.00273018	-0.11709	0.0822619	0.002967	-0.036885	0.0140463	0.0065895	-0.00212764	0.00191653	-5.1176	5.02559	-0.463818	-3.29983	12.993	-5.48854	0.139342	-3.06384	-4.17406	10.9718	4.6712	-4.8398	2.64371	0.206352	-0.409764
	1.53572	3.24851	-0.87832	-0.669522	-0.0168257	-0.332226	0.0779212	-0.0782627	-0.00992232	0.0296738	0.032413	-0.00734715	-0.00201082	-0.00155128	-0.00136427	6.278	2.32437	0.260818	19.555	5.19957	0.729718	-0.0488236	1.28198	-0.427203	2.07353	0.367982	0.0767637	-0.148198	0.0148016	0.0342927
	-6.1885	4.46967	0.568838	0.416796	0.738297	-0.49701	0.0334214	-0.0198987	-0.0963232	-0.0871092	-0.0091011	-0.021074	0.0054268	-0.00258971	0.00078328
	1.07931	-1.63758	-0.354962	-0.318346	0.00776977	-0.170989	0.129174	0.0439835	0.0647861	-0.0108698	-0.0138733	0.00108595	0.00329147	0.000136435	0.000613823
	-0.735638	-3.45725	0.669215	0.0543206	-0.22849	0.0833896	-0.0202794	-0.174095	0.00203304	0.010429	0.0441373	-0.00739317	0.00574508	-0.00324575	0.000490011
	2.54669	0.406687	-0.530779	-0.404348	-0.00562258	0.307096	0.12324	-0.0255735	-0.0735986	-0.0212111	-0.00500493	-0.00346316	0.00393642	-0.000553122	-0.000689009
	2.19296	-3.3157	0.76611	-0.0135645	0.315411	0.0416713	0.0239531	-0.112739	-0.0417047	-0.0200278	0.0136401	0.00769986	-0.00139251	0.00158734	5.28747e-05
	7.77912	5.20383	0.168045	0.591007	-0.404562	0.158822	0.044263	-0.114426	-0.156625	-0.00235884	-0.0566702	-0.00172597	-0.00409604	-0.00379296	0.000760275
	-1.74353	3.03741	2.16438	-0.122984	-0.239374	0.214984	0.124502	-0.0114151	0.0629691	0.0322669	-0.000971207	0.000253511	-0.000126615	-0.00160254	-0.00026873
	-2.44852	1.50461	0.170535	0.0782378	-0.132358	0.334021	0.0900887	-0.0412451	0.0574438	0.00166792	0.00457823	0.00152016	-0.000780274	-0.00168053	0.000334143
	-0.601536	-2.16982	-0.113577	-0.0228672	-0.181669	0.246654	0.0461146	-0.0887504	-0.00908868	0.00299398	0.0337439	-0.00780669	0.00460719	-6.80815e-05	0.00228759
	-4.17499	0.888572	-0.704156	0.449337	-0.12215	0.404371	0.0605906	-0.0575607	0.10408	-0.0457171	0.0048129	-0.00221387	0.00183132	-0.00200827	-0.000175088
	-3.62442	2.69427	-0.692493	0.183643	0.197199	0.310871	0.0399234	-0.126413	0.0966217	-0.0243006	-0.0162998	0.00441604	-0.00188597	0.000521401	-0.001221
	5.00308	-0.403101	0.440978	0.643906	0.404325	0.268824	0.158402	0.104954	-0.113552	0.0342838	0.00527067	-0.00609908	0.00244392	0.00250535	-0.000590692
	2.68997	-3.81401	0.907003	0.295302	0.546755	-0.0309684	-0.00884872	-0.136266	-0.0463771	-0.00238532	0.0114469	0.0177369	-0.00714285	0.000692513	-0.000811598
	-2.92726	0.38721	-0.493146	0.240084	-0.189662	0.384221	0.0738684	-0.0466909	0.0586663	-0.0114464	0.0148972	-0.00238658	0.0011448	-0.00187268	0.00105568
	0.838728	-0.249548	-0.203321	-0.288644	-0.0830943	0.307319	0.110007	-0.027124	-0.0363168	-0.00600991	0.00971431	-0.00281168	0.00265874	-0.000121778	0.000871782
	0.813564	-3.91454	0.215017	-0.0838991	0.13591	0.0243737	-0.0363505	-0.205517	-0.0249435	-0.017673	0.0241505	0.00662892	-0.000342009	-0.00190041	-0.000504958
	-2.71035	2.77841	-0.762911	0.0123002	0.176071	0.29581	0.0406668	-0.13839	0.0623586	0.00130798	-0.0138594	0.00522982	-0.00299303	0.000456158	-0.000638174
	3.05456	-2.06915	0.45102	-0.0161037	0.293473	0.170064	0.0969951	-0.0155936	-0.0670801	-0.017827	0.00869345	-0.00104223	0.00246611	0.00346187	0.000470554
	1.94182	-4.03966	0.315539	0.0095218	0.398664	-0.016309	-0.0333216	-0.193143	-0.0393698	-0.0239004	0.0127172	0.0151509	-0.00462293	-0.000674003	-0.00106234
	1.63329	4.83909	-0.393858	-0.676969	-0.0587004	0.106195	-0.0012777	-0.272842	-0.0554301	0.0499835	-0.0298708	-0.00198087	-0.00141402	0.00197979	0.00106922
	-2.93513	4.89417	1.23496	-0.0984741	0.237032	0.10077	0.029442	-0.18146	0.0961566	0.0381051	-0.0216657	-0.00279712	0.000423775	0.00454469	-0.000839913
	3.14923	-0.179998	0.708027	-0.254734	0.00899254	0.24971	0.152606	0.0367654	-0.0685388	-0.0214694	0.000388993	-0.00693337	0.00614884	0.000771826	-0.000678732
	-1.8105	-4.01772	0.266907	0.234505	-0.359923	-0.115198	-0.218423	-0.147702	0.00415613	0.0284091	-0.0157653	-0.0299525	-0.0133604	-0.00103513	-0.00152928
	3.65346	-0.6463	-0.76572	-0.226548	0.255037	0.123883	-0.115534	0.157447	0.00685668	-0.0244935	-0.00897451	-0.00946538	0.00313954	-0.00031125	-0.00194888
	0.789803	-2.39532	0.624566	-0.193295	0.00842078	-0.00117238	-0.119415	0.0723056	0.0281249	-0.00428475	-0.00792843	-0.00697617	-0.00178533	0.00140088	0.00107493
	7.89843	5.37371	0.111699	0.564148	-0.395493	-0.0643641	-0.328536	0.0832601	-0.00200447	-0.0163695	0.00706088	0.013708	0.00827217	-0.00201553	0.000630672
	-2.03287	1.81036	2.06766	-0.0390777	-0.239805	0.0313258	-0.0680676	0.198796	0.0175804	0.0266198	0.0111127	0.00427348	-0.00113131	-0.00166072	-0.000380302
	-2.45438	0.517365	-0.149091	0.0998755	-0.100392	0.131641	-0.103705	0.128494	-0.0106102	0.00165058	0.00461127	0.00569355	-0.00404694	-0.000355424	7.5219e-05
	-2.28999	-2.49738	-0.490222	0.254986	-0.310553	0.0914209	-0.141063	0.0234704	-0.0146774	0.0113864	0.00981886	-0.00989867	-0.000406334	0.00193496	0.00118773
	-1.17093	0.0810171	-0.880429	-0.0999035	-0.0137963	0.148147	-0.120203	0.10419	-0.0228531	0.00631631	0.0039096	0.00482184	-0.00418448	-8.86329e-05	0.000183352
	-3.59807	1.59756	-0.270119	0.228061	0.0655442	0.103815	-0.121091	0.109132	-0.00346272	-0.018138	-0.000964725	0.0100772	-0.0031212	-0.000759091	-0.000603011
	1.8215	0.0761199	-0.0628078	-0.404977	0.00429561	0.102949	-0.103213	0.152616	0.00125669	-0.00835834	-0.000824904	-0.00422057	0.00169505	-0.000899795	-0.00131084
	1.63562	-3.1384	0.525557	-0.156735	0.221967	-0.0642223	-0.148627	0.0253327	0.0438741	-0.0122981	-0.018666	-0.00396092	-0.00366413	0.000727269	0.000929226
	-2.48417	-0.189761	-0.453206	0.151857	-0.1417	0.151718	-0.10614	0.115416	-0.0146594	-0.00185099	0.00464095	0.00302645	-0.00412823	0.000365796	0.000429253
	-0.142697	-0.621276	-0.343877	-0.202728	-0.0525153	0.121726	-0.106661	0.118682	-0.00900842	0.00395362	0.00214394	-0.00102238	-0.0025424	0.000484505	0.000337289
	-0.444672	-2.61821	-0.0939009	-0.0601486	-0.0941831	0.0351661	-0.138507	0.031405	0.00615747	0.00459603	-0.00138596	-0.00641587	-0.00235455	0.00166758	0.00139622
	-2.92225	3.11675	-0.696741	-0.0353655	0.365739	0.000489956	-0.187528	0.023387	-0.0186096	0.0187194	0.0058391	0.0110525	0.000744918	0.000395256	-5.01775e-06
	1.88022	-1.41933	0.329396	-0.291244	0.0833547	0.0586736	-0.0991902	0.134147	0.0219288	-0.0132835	-0.00772018	-0.00836406	0.00035319	0.000969737	-3.98791e-05
	0.891336	-4.09718	0.136614	-0.111	0.21527	-0.137504	-0.205774	-0.0900611	0.0425713	-0.00999776	-0.0225601	0.00257431	-0.00605704	-0.00185082	0.000216279
	1.45361	3.85207	-0.590105	-0.649555	0.0473252	-0.0585685	-0.242269	-0.0101483	-0.0375681	0.0458649	0.0183829	0.00693018	0.00689812	-0.000444478	0.00015908
	-4.63371	4.56309	0.931791	0.154729	0.55465	-0.151936	-0.187248	0.0187355	0.0261859	-0.00381406	0.0014473	0.00224037	0.00956666	0.00264458	-0.00022303
	2.0481	-1.05651	0.221954	-0.319163	0.0755433	0.0753902	-0.0967623	0.146493	0.0177023	-0.0142587	-0.00648453	-0.00820291	0.00105349	0.000546112	-0.000481264

## Sheet: PCA1_HID1
	-1.53181	-2.44176	-0.322533	-1.00925	-0.19434	-0.903834	-1.75159	1.2521	-2.37883	-0.417713	-0.32039	1.98362	1.41341	2.5877	-2.0469	-0.00463955	-0.0126405	0.0336367	0.13958	-0.31009	-0.540581	-0.962831	0.0347358	1.94679	-0.282018	-0.211514	0.0197422	-0.0071823	0.0306004	0.00319323
	1.11686	-0.695378	3.21306	2.19115	0.175576	-0.0980173	-0.790868	-0.907372	1.36005	-3.51017	3.4654	1.42195	0.701948	0.10506	-0.798846	-0.00280687	-0.0150739	-0.000332203	0.0595327	-0.218984	-0.944019	1.43897	-1.09866	0.533106	0.733444	0.0176804	0.457847	-0.00658147	0.0183142	0.00470256
	0.35249	0.00998063	0.79922	0.149202	0.314413	-0.486811	0.48875	1.24424	-0.109639	-0.542675	-0.714141	-0.703278	0.364826	0.636682	0.818666	-0.00393189	-0.00390255	0.0390644	0.00842574	-0.342282	0.154988	0.683639	1.78327	0.486953	1.01566	0.433498	0.0744869	0.0249139	0.00649018	0.00433254
	0.354292	3.65169	-1.23649	2.19421	-2.51206	-4.32654	-0.15984	0.0502327	1.18849	-0.40215	-1.24443	0.534093	-0.331477	0.00555612	-0.652205	-0.0203629	-0.0690188	0.107398	0.0901957	-0.690074	-0.856955	-0.522368	-0.0419936	-0.458258	-0.266259	1.83179	0.315874	-0.049062	0.0629213	0.0231865
	-0.586958	0.208949	1.35942	-0.591386	0.671195	-1.30566	1.59948	2.61027	-0.149191	0.655751	0.308234	-0.390003	0.781457	-0.834612	-0.0926957	0.0247197	0.0401111	-0.132739	0.078445	-0.473032	1.55329	0.751559	-0.415421	0.694599	-0.849326	0.790106	0.133178	0.0625713	-0.0502635	-0.0304497
	-0.921093	0.77022	0.623782	-1.02745	0.40316	-0.704427	0.18042	-0.241548	-0.930155	-0.636052	0.00984025	-0.563662	0.126973	-0.51121	0.930432	0.00139764	-0.0703109	0.233494	0.445532	0.370469	0.730571	-0.683125	-0.768264	0.192918	1.50821	0.620448	-0.742806	-0.101004	0.091503	-0.00426667
	-0.400957	1.15354	-0.412505	-1.99388	0.0764647	-1.44803	-1.35475	-0.213373	-2.44994	-0.437961	0.59266	-0.248313	-0.170055	2.92972	-0.0437792	0.00691566	0.210247	1.49627	-0.238064	-0.69218	-0.173974	0.281252	-0.0349182	-0.0632473	-0.230105	-0.158261	-1.16089	0.938738	0.111095	-0.0197079
	-0.812529	-0.761896	0.121192	0.662798	-0.0882552	-0.0871637	0.140358	-0.800052	0.432038	-1.6194	-1.62976	-1.47258	0.430748	0.0453142	-1.53826	0.00495623	-0.0273966	0.00687855	-0.110919	1.65164	-0.483741	0.548798	0.235421	0.407148	-0.587665	0.732402	-0.916219	-0.183371	-0.0281833	-0.00271057
	-1.35828	0.456107	0.413424	-1.28615	0.0965815	-0.989041	0.788788	0.207045	-1.0406	-0.345345	0.559718	-0.771452	0.0944477	-1.19386	0.594961	0.123903	0.0164414	0.208226	2.18749	-0.0298482	-0.142153	0.225559	0.203475	-0.17239	-0.340305	-0.217227	-0.0661293	-0.134186	0.229332	-0.167049
	-1.01334	0.261065	0.921252	-0.579316	0.556167	-0.338802	0.542688	-0.46656	-0.120713	-0.779073	-0.864222	-0.114655	0.704034	-1.31167	-0.415028	0.0743659	-0.170185	1.43188	-0.0495124	0.887379	0.274881	-0.169027	0.0417993	0.10939	0.0290052	0.110421	1.44027	0.277546	0.293036	-0.101275
	0.898266	-0.8665	0.373299	0.945354	-0.287385	0.0576007	0.292541	0.971629	0.114349	-1.28764	-1.12673	-0.892822	0.173933	1.01791	1.41339	0.595337	1.21788	-0.539652	0.179984	0.322386	-0.0615142	-0.150689	-0.0181287	0.0207174	0.147534	0.174954	0.265048	1.36272	-0.70233	-0.698363
	-0.657728	0.747911	0.703066	-0.840282	0.46432	-0.635522	0.12365	-0.0938085	-0.800757	-0.649788	-0.17914	-0.5274	0.174114	-0.228035	0.967643	-1.40822	0.0623206	-0.319441	0.301486	0.22423	0.012439	-0.0345728	0.00565314	0.0118366	0.0183959	0.0581162	0.16415	1.00918	-0.0114525	1.40432
	-0.423164	0.53199	0.735243	-0.483865	0.464736	-0.422915	0.0989737	-0.128511	-0.506089	-0.824311	-0.584929	-0.557869	0.258753	-0.0741346	0.811225	0.537453	-1.05733	-0.660544	-0.0720947	0.0702832	-0.0162851	5.60698e-05	0.00340811	0.00247203	0.00458235	0.0214833	-0.0664552	1.05781	1.47814	-0.301317
	-0.181575	0.684725	0.67304	-0.585946	0.428106	-0.515852	-0.0452739	0.0544859	-0.72972	-0.750397	-0.405838	-0.517184	0.141359	0.362314	1.21625	-0.0850467	1.6	-0.0425731	-0.172918	-0.000977334	0.0241885	0.00453426	-0.00411274	0.00696316	4.12523e-05	0.0120863	0.0204309	-0.481118	1.53951	0.226573
	1.93977	0.744136	0.677724	-1.89005	-0.275071	0.495994	1.60336	-1.27335	-0.283148	-1.17114	-0.340637	2.118	0.701285	-1.54976	0.149448	1.61166	0.0458748	0.0531176	0.0474132	0.00869466	0.00267048	-0.00289336	0.0011813	0.000567333	-0.00103341	0.000625707	0.0188158	-0.00714639	-0.192177	1.61587
	-0.280628	-0.494981	0.641008	0.487124	0.217901	-0.407541	0.67309	0.768706	0.385687	-0.794192	-1.16509	-1.11764	0.568655	0.129329	-0.745183
	0.237963	-2.43089	-0.0231388	1.11879	-0.834272	0.413742	-0.419635	1.15953	-0.694142	-1.54299	-1.25953	0.446889	0.444735	0.64637	2.74382
	0.0150286	0.629613	0.609568	-0.462234	0.245094	-0.314322	0.755418	-1.02465	0.606408	-0.76091	-2.37021	1.24556	1.28245	-1.24084	-2.23625
	2.17389	-1.51851	-2.13552	-2.13839	-3.01176	0.056964	3.49034	-0.0777118	-0.950548	-1.36223	1.35718	-0.945179	-0.663417	-0.824199	-0.888368
	0.374297	-0.48921	0.394	0.632597	-0.059223	-0.0271123	0.208021	0.303604	0.118258	-1.30963	-1.20529	-1.07094	0.211784	0.721432	0.627124
	1.94029	-0.487172	-0.539451	0.323142	-0.422196	0.457892	-1.38799	1.16022	-0.767753	1.15855	-0.137914	0.769878	2.1375	-1.19018	-1.32153
	-0.202167	-0.638105	0.0329968	-1.02318	-0.240874	0.536929	-0.616333	-1.25981	0.912083	0.828221	-0.86658	-1.60824	0.432989	0.336335	-0.72119
	-0.486043	1.29634	-0.672345	-0.379583	-1.19349	1.344	-0.719494	0.97039	0.751944	0.135495	0.298144	-0.173962	0.719996	-0.00297976	0.567121
	-0.468341	-2.9314	1.34015	-2.12644	-2.03135	-2.27687	-1.11998	-1.01905	1.89305	1.58235	0.543634	0.171377	-1.77153	-1.08125	1.5818
	-0.119543	-0.675564	1.71782	1.07188	0.0270905	-0.181075	1.45153	1.73006	0.259675	2.56651	0.1948	0.121551	0.639893	-0.207044	-0.371986
	0.248486	-0.411059	0.778533	1.22758	-0.122423	0.0572225	0.136441	-0.507336	-0.701079	1.46767	0.347006	-0.572825	0.563892	-0.62706	0.139176
	3.01646	0.608407	-0.101197	0.081032	0.04319	0.437339	-1.27788	-0.149448	-0.576606	1.02593	-0.0902114	-0.235141	1.36808	-0.142354	0.388716
	0.265484	-0.720665	-0.468203	2.01128	-0.879047	-0.297041	-0.321424	-1.48034	-1.83194	0.929993	0.941488	-1.62717	0.263316	-0.491121	-0.581723
	-1.52973	-0.0647107	0.114273	1.77861	-1.23453	0.581852	0.514334	-1.85744	-1.1406	0.646171	0.355475	-0.614696	-0.611388	0.461865	-0.287916
	0.111433	0.78867	1.50517	-1.70573	-0.152161	0.321917	-0.84848	-0.207917	1.96344	0.077686	2.75555	-0.270971	0.458441	1.34534	-0.854702
	-2.1616	1.36728	-0.288361	-0.219209	-1.46919	1.63814	-0.835222	1.16004	0.927455	-0.378001	1.21576	0.814154	0.758593	-0.927725	0.803635
	1.31388	-0.338789	0.256276	1.30432	-0.119592	-0.0980136	-0.594192	-1.11071	-1.28455	1.17319	0.563773	-0.90086	0.769917	-0.738316	0.160212
	1.10647	0.0860025	0.298162	-0.377394	0.103493	0.516994	-0.616005	-0.699177	0.326685	1.07066	-0.509777	-1.08455	0.788741	0.0595757	0.222076
	-0.524353	0.121479	-1.08719	0.0470682	-1.16294	1.29041	-1.30606	0.553076	-0.145535	0.237951	-0.423069	0.381275	1.38079	-1.28366	-0.351168
	-1.16948	0.0472499	0.675103	1.26141	-0.784459	0.778657	0.328795	-1.9418	-0.759547	0.74381	-0.0596994	0.0340256	-0.411961	0.252206	0.184162
	0.539168	1.49365	-0.221495	-0.993614	-0.727541	1.0254	-0.621571	0.269084	1.19983	0.232786	0.570117	-1.00915	0.394421	1.28442	0.327255
	-2.00108	0.690425	-1.04885	-0.104776	-1.56349	1.67027	-1.10399	0.579274	0.411223	-0.284825	0.057959	0.359956	0.909696	-1.21249	0.282258
	0.398556	-0.105097	1.57798	-0.910022	-0.735907	0.747259	0.24238	-1.6368	0.824691	1.55237	-2.39656	1.8768	-1.04597	1.16318	1.29854
	-0.679623	0.962843	1.44455	1.25864	-1.22702	0.882847	1.98963	0.188119	-0.0437993	1.59419	-0.100829	1.47037	-1.06019	2.58617	-0.39566
	0.228506	-0.167531	0.0558185	-1.11893	-0.351193	0.328769	-0.155003	0.327679	1.39288	1.0954	-0.0896545	-1.79442	0.559979	1.04531	-1.05931
	0.275634	0.00173512	1.03826	-0.362706	-0.465077	0.0529062	-1.43016	1.27748	-1.4828	0.217628	-0.356152	1.71419	-3.82924	-1.64223	-2.81995
	-0.71898	-0.792322	-1.14268	0.0928055	0.909321	0.421702	-0.35182	-0.895628	1.38647	-0.88748	0.0112693	-1.14915	-1.10625	0.468072	-2.08508
	1.11066	0.402059	-0.358955	0.310435	0.618096	0.491316	-0.110625	1.22379	0.419755	-0.04276	-0.140557	-0.181116	-1.46499	0.28975	0.517185
	-0.0841385	-1.58745	-2.7639	0.690969	0.568278	-3.06458	-0.713466	-0.337342	2.09369	0.593025	1.06233	1.45734	0.700426	0.045517	1.1353
	-0.417801	-0.348403	0.234149	0.395126	1.79126	-0.632171	1.52609	2.2675	0.357542	1.60316	0.968281	0.402779	0.444776	-0.805801	-0.267469
	-0.50293	0.282563	-0.362361	0.100298	1.40035	-0.202271	0.145274	-0.302108	-0.540032	0.408557	0.797479	-0.0417705	-0.340149	-0.796076	0.512879
	1.70292	0.901537	-0.324729	-0.286777	0.985705	-0.255766	-1.26568	-0.068885	-1.30964	0.221295	0.490953	0.470366	-0.951926	0.405669	0.104654
	-0.376148	0.373043	-0.375279	-0.0736743	1.57713	0.229134	-0.325117	-1.12299	-0.239176	-0.0392847	0.181044	0.0699842	-0.456415	-0.730609	0.555151
	-1.38458	-0.0880432	-1.01035	0.286384	0.827864	-0.127479	0.654065	-0.7047	-0.789342	0.179463	1.15739	-0.185494	-0.290151	-0.763725	0.413137
	-0.565164	-0.629922	-0.780395	0.0598593	1.43194	0.178031	0.130785	-0.0689688	1.01926	0.0734016	-0.417452	-0.698465	-0.481069	-0.0783672	-1.36775
	0.543551	0.0175239	-0.535102	0.622233	-0.0189405	0.95521	-0.179525	1.19864	0.628054	-0.650762	-0.141425	-0.0280059	-1.86262	-0.0491957	0.830532
	-0.0670637	0.570476	-0.394644	-0.00565574	1.32882	-0.228161	-0.268547	-0.543443	-0.784736	0.274401	0.772495	-0.164265	-0.602293	-0.583376	0.629493
	0.229085	0.393926	-0.313759	-0.0333374	1.48978	0.227588	-0.244889	-0.310851	0.151724	0.082371	-0.0421573	-0.200456	-0.718238	-0.26838	0.235121
	1.35943	0.716312	-0.315131	0.0427867	0.788019	0.368508	-0.740442	0.405693	-0.337087	-0.0756845	-0.0824527	0.245805	-1.30094	0.187342	0.730007
	-0.702442	0.128168	-1.01825	0.0367548	1.01923	0.753645	0.977727	-1.5034	-0.211468	-0.217619	0.55647	1.5186	0.307821	0.0804313	0.710941
	0.493719	0.0441608	-0.598206	0.218305	0.893053	0.434012	0.0710051	0.641872	0.957252	-0.178284	-0.154552	-0.78865	-1.29351	0.46074	-0.488114
	-0.602303	-0.895365	-0.740146	0.805232	-0.505615	1.20378	-0.702747	0.960002	-0.00492204	-0.902473	-0.522252	0.746058	-1.65908	-1.21671	0.788247
	0.250808	-0.480779	-1.18689	-0.295743	1.9073	0.37022	0.454205	-1.20549	1.13374	0.408178	-1.36357	2.37375	1.20304	0.41126	0.0670987
	0.122916	0.0729393	-1.87188	0.32195	-0.168341	0.684335	2.67957	0.179002	-0.161173	0.118435	1.36587	1.35529	0.175828	2.13307	-0.163678
	0.21125	-0.155224	-0.677624	0.175655	1.01414	0.364427	0.0908721	0.446789	1.03953	-0.153666	-0.195122	-0.88133	-1.13019	0.403342	-0.862897

## Sheet: PCA1_HID2
	-5.04493	-3.12099	-0.168559	0.513985	-0.610021	-0.300363	-0.0701412	-0.166636	-0.0399338	0.0417013	0.0196867	-2.02832e-05	-0.0206985	-0.00025546	-0.00276051	3.57343	8.3806	-1.41629	-1.87514	5.42047	5.20352	-1.19127	1.38087	-0.974456	-6.79433	4.83652	-0.0822807	-5.45553	-5.57614	4.61368
	4.36439	-3.64315	-1.04486	1.19392	0.837049	-0.107182	0.150511	0.166849	0.147321	0.0932672	-0.000165576	-0.00710261	-0.000714972	-0.0016646	0.000339914	8.24832	2.81862	-0.803322	-2.72252	-1.39804	7.65945	-2.92463	2.08737	-3.51647	1.34101	4.62082	-3.00589	-10.9584	-0.296481	-7.62803
	-0.826746	-1.19557	0.455834	-0.174588	-0.206728	-0.201276	0.126872	0.0920849	0.0344068	0.00314351	0.00893836	0.00234259	-0.00182298	0.000731369	0.000815818	-4.32693	7.95529	-0.986224	0.511533	8.6739	-1.53392	1.63405	-0.467053	2.56807	-10.4217	1.31113	3.18436	4.8157	-7.02277	14.4354
	10.6905	2.13604	-0.027399	0.494704	-0.670753	-0.494837	0.0148298	-0.147094	0.151532	-0.0587525	-0.0425811	-0.00318616	0.00851504	0.00426689	-0.000155824	6.79945	5.67428	-1.87302	0.90845	-5.61517	-5.53967	-2.15604	-10.8612	-1.04816	-0.546718	6.68733	-5.30372	6.51056	0.393872	-0.19711
	-1.60711	1.62578	1.90539	0.0354768	-0.385002	-0.228088	0.152155	0.179321	-0.0151115	0.0177641	-0.00642328	0.00374986	0.00363924	-0.00112453	-0.000425289	6.79945	5.67428	-1.87302	0.90845	-5.61517	-5.53967	-2.15604	-10.8612	-1.04816	-0.546718	6.68733	-5.30372	6.51056	0.393872	-0.19711
	-2.2715	0.749114	-0.515698	0.108059	-0.187362	-0.133391	0.102083	0.0927475	-0.0552167	-0.00311198	0.00110751	0.00869324	0.0061055	0.000547	2.5923e-05	-4.30174	7.9694	-0.88052	0.401593	8.76524	0.873405	1.46358	-2.91727	6.99662	-8.23281	3.10514	6.53783	2.37724	15.734	-13.241
	-5.02813	-0.890875	-0.920357	0.634028	-0.557882	-0.0775917	0.019837	0.0130921	-0.0964966	-0.00810741	0.00832607	-0.00105679	-0.0072325	0.00566944	-0.000526349	-5.67621	6.88604	-1.92051	2.96114	-5.09202	10.9518	0.61486	-6.38462	18.6437	7.53997	-5.1163	-6.24173	-2.50363	-3.48552	1.32275
	1.77895	-1.42983	-1.10497	-0.440985	0.0537257	-0.177961	0.141707	0.0578246	0.0628545	-0.024657	0.00554364	-0.00351827	-0.00350307	-0.00137094	-0.00169927	8.2013	2.82439	-1.66777	-1.13577	-3.00866	-2.61885	24.893	-2.16849	0.0944278	-0.382758	-4.45484	3.45702	-4.1525	-0.252985	0.0807664
	-2.81382	2.09169	0.0252925	0.254127	-0.172928	-0.161533	0.102751	0.119233	-0.073661	-0.016562	0.000402147	0.00883205	0.00761912	-0.000710033	-0.000507519	5.81792	-6.78306	2.55517	-3.57838	6.34474	1.972	-1.51646	-7.11334	3.07629	-2.40687	-4.19585	1.0622	1.49458	-4.16682	-2.54185
	-0.134025	1.10682	-0.585583	-0.248065	-0.0720788	-0.207825	0.11888	0.0667892	-0.0268986	0.0140103	-0.00916593	0.00454836	0.00541133	-0.00164194	-0.000940944	5.77098	-6.82453	1.24327	-3.22834	3.91427	-9.90876	0.357665	6.00136	15.2882	5.41213	14.2482	0.86879	-5.21001	2.61989	5.1533
	-0.172572	-2.66862	0.0848797	-0.25888	-0.00275338	-0.24413	0.108453	0.0378034	0.0840808	-0.0122938	0.0228486	0.0020297	-0.0055743	0.00017904	0.00160378	6.22647	6.40151	-1.2441	-2.47044	2.54191	6.9073	-2.1625	1.86019	-2.32679	-3.39032	5.18026	-1.54083	-8.6949	-3.47576	-1.03141
	-1.99642	0.277433	-0.456716	0.0441481	-0.198702	-0.137826	0.105691	0.0889901	-0.0407245	0.00100449	0.00190936	0.00773162	0.00478361	0.000831046	0.000232313	0.709295	6.64806	26.7267	0.347652	-2.77467	-0.774825	0.482832	1.00128	0.381544	0.163879	-0.0456222	-0.0490336	-0.0339705	-0.00823282	-0.00210321
	-1.25449	-0.298828	-0.536472	-0.100586	-0.154031	-0.151798	0.112708	0.0778783	-0.0159945	0.00279628	0.0029827	0.00609178	0.00312659	0.000639007	0.000286061	6.8796	5.57537	-1.36462	-4.26145	-0.0305581	8.09757	-1.95705	2.69055	-1.12513	13.2956	2.15259	16.6994	11.2829	-0.443435	2.17467
	-1.84053	-0.553585	-0.452162	-0.00856089	-0.2047	-0.144289	0.102407	0.0738277	-0.0206699	0.00240792	0.00572602	0.00645311	0.00228934	0.0015143	0.000723633	6.47744	6.0785	-2.45259	-2.15099	0.158208	-5.92527	-1.0275	15.3645	6.11165	-2.99612	-6.86918	-7.19054	10.032	-7.97554	-9.87789
	-0.859605	4.89275	-0.709323	-0.103845	0.405687	-0.463987	0.0287118	-0.0698107	-0.104241	0.0427015	-0.0246067	-0.0080202	0.00465558	-0.00120053	0.00161136	6.76506	5.67226	-2.31519	0.655729	-5.95811	-9.9695	-10.3843	-1.42162	3.44878	-2.67543	-13.557	9.66773	-10.2004	4.45256	4.49328
	0.752999	-0.988982	0.167861	-0.35836	-0.114085	-0.205705	0.150998	0.0999415	0.0561061	-0.00679936	0.00432542	-0.00177329	-0.00274373	-0.000893531	-0.000737367	-5.81792	6.78306	-2.55517	3.57838	-6.34474	-1.972	1.51646	7.11334	-3.07629	2.40687	4.19585	-1.0622	-1.49458	4.16682	2.54185
	-2.00857	-3.91546	-0.0747018	-0.0791678	-0.0169554	-0.352676	0.00568865	-0.11225	0.0783454	-0.00191554	0.0405019	0.013557	-0.00813188	-0.00211088	0.00208257	8.55243	-1.42156	0.485928	-4.25544	2.35323	7.67381	0.0472428	4.22538	-0.455881	-1.32424	-5.99368	-11.0996	4.94398	16.5373	11.5777
	3.06393	2.45955	-0.868236	-0.634966	-0.0688902	-0.399289	0.0802147	-0.0695454	-0.0107557	0.0336421	-0.032407	-0.00751095	0.00153807	-0.00164778	-0.00148615	-5.81792	6.78306	-2.55517	3.57838	-6.34474	-1.972	1.51646	7.11334	-3.07629	2.40687	4.19585	-1.0622	-1.49458	4.16682	2.54185
	-3.57083	6.96806	0.581676	0.430346	0.734999	-0.53745	0.0173945	-0.00507153	-0.102949	-0.0917221	0.00811131	-0.0218023	-0.00523608	-0.00256694	0.000862096	-3.18858	8.40614	-0.488747	-4.26142	15.4878	-8.51699	0.192109	-3.79702	-5.61791	15.0326	-4.78359	-6.7809	-3.99211	0.345574	-0.544113
	0.164202	-2.05199	-0.355925	-0.303987	-0.0123152	-0.20182	0.122832	0.0559004	0.0632068	-0.0132033	0.0151421	0.000780478	-0.00367691	0.000199766	0.000679174	8.14779	-1.18736	0.505573	25.1245	7.49815	1.46788	-0.183347	1.60661	-0.478035	2.84082	-0.444299	0.123332	0.219621	0.0140467	0.0467882
	-2.45606	-3.04949	0.667065	0.0560278	-0.226271	0.0910084	-0.00167177	-0.177902	0.00227508	0.013964	-0.0437082	-0.00859007	-0.00798496	-0.00330837	0.000541837
	2.64649	-0.648769	-0.541869	-0.429673	0.00320057	0.311011	0.132091	-0.0189733	-0.074673	-0.0224181	0.00503801	-0.00395337	-0.00451904	-0.000471004	-0.000720653
	0.348851	-4.14798	0.758504	-0.0298952	0.327626	0.0280815	0.0349703	-0.111381	-0.0423919	-0.0191156	-0.0158047	0.00782691	0.00127719	0.0016144	5.20885e-05
	9.87772	1.62829	0.184784	0.598906	-0.384804	0.20465	0.0516908	-0.107404	-0.16139	-0.00766545	0.0579689	-0.000706132	0.0059423	-0.00398537	0.000777948
	-0.103486	3.64263	2.17155	-0.131425	-0.234178	0.223138	0.133529	-0.00671525	0.0640552	0.0330729	0.00263222	0.000218544	-0.000263402	-0.00166883	-0.00029752
	-1.48805	2.53089	0.167798	0.0598656	-0.112473	0.351772	0.104525	-0.0409859	0.0591325	0.00207585	-0.00470444	0.00155851	0.000526519	-0.00177085	0.00034347
	-1.63416	-1.81969	-0.120914	-0.0350176	-0.170689	0.260996	0.0612556	-0.0896159	-0.00797379	0.00581806	-0.034032	-0.00859386	-0.00549266	-6.35605e-05	0.0024896
	-3.39557	2.70503	-0.709598	0.427449	-0.0850459	0.439582	0.0779669	-0.0605249	0.105738	-0.0472887	-0.00591606	-0.00258124	-0.00247065	-0.00203564	-0.000193844
	-1.96646	4.2236	-0.697604	0.158691	0.224003	0.313912	0.0618762	-0.13036	0.0972732	-0.0264554	0.0157745	0.00473112	0.00227538	0.000553135	-0.00132554
	4.46313	-2.53301	0.436708	0.609754	0.450502	0.294866	0.152404	0.116	-0.113797	0.0367168	-0.00422312	-0.00640513	-0.00240552	0.00265005	-0.000599741
	0.534733	-4.85455	0.90129	0.278441	0.567348	-0.0492593	0.00245199	-0.136762	-0.0468282	-0.000568888	-0.0142478	0.0185933	0.00737745	0.000593221	-0.000920459
	-2.48773	1.67316	-0.498751	0.220856	-0.162855	0.413571	0.0897372	-0.048275	0.0607169	-0.010739	-0.0154892	-0.00266557	-0.00167859	-0.00195441	0.00112999
	0.707103	-0.562331	-0.212763	-0.310469	-0.0732263	0.315115	0.120509	-0.022984	-0.0359012	-0.00533945	-0.0100088	-0.00318332	-0.0030734	-0.000101056	0.000953494
	-1.233	-4.12882	0.207235	-0.0910505	0.139069	0.0104012	-0.0167841	-0.209334	-0.0256311	-0.0162161	-0.0259173	0.00641529	-0.000836722	-0.00198116	-0.00056355
	-1.06691	3.91083	-0.76825	-0.0109239	0.19456	0.291759	0.0632915	-0.142055	0.0630509	0.000435381	0.0138135	0.00571338	0.00356135	0.000441597	-0.00070335
	1.81137	-3.29375	0.441484	-0.0420879	0.313576	0.168849	0.10149	-0.00934657	-0.0677415	-0.017251	-0.00986181	-0.00131933	-0.00238465	0.00362798	0.000540652
	-0.253067	-4.73134	0.306694	-0.00378488	0.408434	-0.0386592	-0.0162699	-0.195849	-0.040339	-0.0231464	-0.0155907	0.0156156	0.00423837	-0.000766084	-0.00118454
	4.01686	3.99313	-0.391529	-0.678659	-0.0815792	0.0741597	0.0266435	-0.275146	-0.0579555	0.0492243	0.03252	-0.00143131	0.0028618	0.00201076	0.00116222
	-0.266432	5.98397	1.24157	-0.109868	0.240159	0.0751059	0.0518012	-0.183863	0.0955565	0.0376299	0.0243578	-0.00265745	0.000501814	0.00474807	-0.000868745
	2.87269	-1.51461	0.700999	-0.278538	0.0220197	0.258672	0.153896	0.0470228	-0.0697051	-0.0223008	-6.9401e-05	-0.00774289	-0.00691887	0.000941478	-0.000687521
	-3.75727	-3.14357	0.268895	0.253616	-0.367246	-0.0930998	-0.209275	-0.163013	0.00411891	0.0288114	0.015707	-0.0282953	0.0177075	-0.00127762	-0.00171132
	3.13418	-2.13788	-0.778237	-0.252106	0.266433	0.135622	-0.12747	0.146885	0.00869691	-0.0259356	0.00916603	-0.00990927	-0.003308	-0.000199162	-0.00207702
	-0.47602	-2.65506	0.618588	-0.201252	0.00809859	0.00782975	-0.125907	0.0625476	0.0297581	-0.00488877	0.00764386	-0.00661263	0.00315473	0.00140401	0.00115857
	10.0611	1.72828	0.131691	0.583698	-0.388385	-0.0101267	-0.340833	0.0600597	-1.06318e-05	-0.0172218	-0.00659392	0.0126388	-0.011065	-0.00195542	0.000706781
	-1.00164	2.5772	2.0745	-0.0411652	-0.239878	0.0595621	-0.0850945	0.192659	0.0209298	0.0287071	-0.0109057	0.00430276	0.000523879	-0.00175199	-0.000426238
	-1.99599	1.58051	-0.152421	0.0887927	-0.0892653	0.163287	-0.112628	0.118495	-0.00750476	0.00274307	-0.00613473	0.00621957	0.00449606	-0.000449718	5.29436e-05
	-3.38333	-1.41865	-0.494091	0.255565	-0.302374	0.131387	-0.142387	0.0116306	-0.0127868	0.0129367	-0.0100618	-0.00983968	0.00135705	0.00196417	0.00129314
	-0.996438	0.6334	-0.888691	-0.115029	-0.00712651	0.16951	-0.126173	0.0923079	-0.019704	0.00764002	-0.00533948	0.0053868	0.00479122	-0.000178189	0.000171112
	-2.51605	3.1264	-0.272602	0.214266	0.0822183	0.131911	-0.129391	0.098455	-0.00103402	-0.0183523	-0.000889838	0.0104945	0.00311272	-0.000826071	-0.000677495
	1.78032	-0.677686	-0.0708117	-0.421168	0.00303866	0.115219	-0.114607	0.142957	0.00362139	-0.00854155	0.000864217	-0.00450682	-0.00206578	-0.000864769	-0.00140412
	-0.0721012	-3.73219	0.517886	-0.166801	0.223655	-0.0674868	-0.152283	0.0139254	0.0448288	-0.0141295	0.018202	-0.00328698	0.00535947	0.000682856	0.000985103
	-2.37666	0.916045	-0.457994	0.14113	-0.128624	0.187762	-0.113631	0.10512	-0.0116417	-0.000836787	-0.00634837	0.00358823	0.00493025	0.000290385	0.000438893
	-0.406066	-0.504276	-0.351776	-0.216331	-0.0495137	0.140803	-0.114448	0.108258	-0.00614055	0.00485777	-0.00303747	-0.000659886	0.003281	0.00044653	0.00035245
	-1.72688	-2.32662	-0.100435	-0.0650441	-0.0928033	0.0527154	-0.140839	0.0198065	0.00793576	0.00499506	0.000903653	-0.00600208	0.0037574	0.00165494	0.00150283
	-1.10824	4.32053	-0.699573	-0.0500212	0.369023	-0.00334099	-0.189837	0.00788723	-0.0166075	0.0203046	-0.00583729	0.0109755	-0.00158809	0.000413489	-2.59549e-06
	1.05674	-2.16073	0.321006	-0.307206	0.085962	0.0682814	-0.109898	0.125325	0.0238706	-0.0141815	0.00756966	-0.00834076	0.000435001	0.00102687	-3.11233e-05
	-1.25873	-4.33909	0.129107	-0.11331	0.2119	-0.147658	-0.200971	-0.105013	0.0426127	-0.012251	0.0220309	0.00351275	0.0074165	-0.00202011	0.000185468
	3.35072	3.1241	-0.589979	-0.650305	0.0203815	-0.0743825	-0.242431	-0.029491	-0.0355615	0.0489081	-0.0163216	0.00594241	-0.00923878	-0.00036389	0.000208371
	-2.0249	6.41042	0.937257	0.143466	0.560776	-0.163583	-0.193634	0.00606943	0.0262166	-0.00420121	0.000228838	0.00103847	-0.0113609	0.0029282	-0.000170218
	1.40348	-1.87768	0.213312	-0.336199	0.0780796	0.0860757	-0.10825	0.137709	0.01973	-0.01511	0.00642031	-0.00830824	-0.000578445	0.000610424	-0.000504756

## Sheet: PCA1_HID3
	-5.13192	-2.98326	-0.198605	0.595556	-0.632128	-0.121533	-0.215734	0.0545565	0.0264875	-0.0597953	0.0238914	0.00427153	-0.0160878	-0.00439075	0.00262269	3.70505	8.23953	-1.26415	-2.8828	5.71675	4.23887	1.69256	-2.35669	5.32702	-0.590722	-5.12443	2.89982	2.21124	-7.14919	-5.18839
	4.16325	-3.56569	-1.11138	1.25048	0.809789	0.143565	0.0910407	0.100928	-0.212534	0.0274578	0.0287421	-0.0119609	-0.00587044	0.00132744	-0.00194972	8.26663	2.62586	-0.763409	-3.12211	-0.688687	5.11302	2.80688	-4.96986	5.53599	-4.52446	4.12069	1.51831	-4.57475	-9.90157	6.42074
	-0.883259	-1.13821	0.444397	-0.0827047	-0.244175	-0.207885	0.127356	0.0631052	-0.0371215	0.0177543	-0.00352865	-0.00278976	-0.00174042	-0.00121908	0.000729472	-4.17355	7.98056	-0.829467	-0.37851	8.28726	-0.0155498	-0.844529	2.33884	0.954935	4.1779	-11.2663	2.15781	7.92508	1.42626	-13.8702
	10.6197	2.06525	-0.0784527	0.664853	-0.728207	-0.291435	-0.181236	0.130073	-0.0148116	0.153519	-0.00853341	0.0106334	0.012917	0.00354787	0.00269443	6.86262	5.50285	-1.8695	1.12651	-5.96527	-3.2853	-10.1368	4.31426	5.05249	-2.03569	-0.361141	-8.97295	4.24388	1.0076	0.127038
	-1.60408	1.69472	1.89014	0.169764	-0.421852	-0.207414	0.207031	0.0372391	-0.0743332	-0.0209095	-0.00345236	-0.000358354	-0.000485594	0.000873561	-0.00108358	6.86262	5.50285	-1.8695	1.12651	-5.96527	-3.2853	-10.1368	4.31426	5.05249	-2.03569	-0.361141	-8.97295	4.24388	1.0076	0.127038
	-2.2875	0.837145	-0.533169	0.172522	-0.206287	-0.117374	0.127008	0.0340739	-0.0224519	-0.0391988	-0.018193	-0.000284168	0.00159877	0.000866724	0.000245043	-4.14537	7.98991	-0.69997	-0.9042	8.60156	2.35771	-2.37725	3.3377	1.29568	7.86497	-9.44616	-2.48539	-4.4194	4.7481	19.4629
	-5.08962	-0.725775	-0.962377	0.726972	-0.556842	0.00875503	0.061874	-0.0141295	0.0903057	-0.0499259	0.0154372	0.00537292	-0.00733855	0.00751633	0.00326007	-5.51939	6.92367	-1.64268	-0.567202	-4.23713	15.2302	-4.67475	4.31525	-0.515045	13.0248	14.1756	0.590438	-0.88445	-0.12345	-3.83103
	1.69466	-1.39525	-1.11756	-0.36014	0.0106658	-0.267495	0.137162	0.0793496	0.0127149	0.0653944	0.00319958	-0.00299239	-0.0025544	-0.00248526	0.000335464	8.20945	2.6477	-1.70908	-0.349594	-3.17136	-3.19965	11.8945	21.7342	-1.83871	1.27815	-0.172519	5.88359	-2.57422	-0.777735	-0.0226194
	-2.82189	2.21552	-0.00386098	0.370406	-0.197403	-0.154591	0.166557	0.00991237	0.00540937	-0.0369046	-0.0173893	-0.000392031	3.27867e-05	0.00291573	-0.00128935	5.67744	-6.84635	2.40272	-2.23851	6.68964	-2.76509	-3.4169	1.00701	4.35578	7.39021	1.76194	-0.846636	-3.73483	-0.183223	-2.54203
	-0.138007	1.14279	-0.589828	-0.195155	-0.105685	-0.231113	0.0940576	0.0738184	-0.0608766	-0.0286533	-0.0097001	0.000333155	0.00228824	-0.00109473	-0.000754517	-5.31225	6.99496	-2.65261	11.311	-1.20509	-10.7923	9.39035	-4.973	15.0811	4.48183	6.46378	-0.0480371	-3.40808	3.66441	-1.0851
	-0.280041	-2.59746	0.0673025	-0.148159	-0.0531101	-0.273967	0.077958	0.0759725	-0.00134065	0.0611926	-0.00117642	-0.00633498	-0.00604346	-0.00134789	-3.99541e-05	6.31412	6.22163	-1.13347	-3.27025	3.0708	5.06776	2.40331	-3.87316	5.92722	-2.59795	-1.01404	2.4845	-0.9503	-9.18143	0.0892116
	-2.0179	0.354239	-0.47098	0.102622	-0.218981	-0.122235	0.120355	0.0423957	-0.0311602	-0.0331726	-0.0162791	-0.000499944	0.00158681	0.000162662	0.000629098	0.833066	6.56154	26.5229	1.15805	-2.90082	-0.59443	0.971332	-0.0984865	-0.38493	0.203767	0.155803	-0.000523997	-0.02998	0.00942161	-0.00925794
	-1.28627	-0.23959	-0.546219	-0.0483397	-0.179185	-0.152593	0.110381	0.0573518	-0.0374936	-0.0179327	-0.0135286	-0.00116984	0.00132307	-0.000936023	0.000767386	6.95317	5.38485	-1.23775	-5.02207	0.622683	5.85182	2.87996	-3.95191	-1.00155	-6.14713	-0.968507	-3.02601	-13.4315	17.9375	-6.69366
	-1.87695	-0.482557	-0.464725	0.046256	-0.226865	-0.127569	0.102542	0.050412	-0.0306416	-0.021881	-0.0135977	-0.001024	0.00100492	-0.000548119	0.00125987	6.54354	5.91781	-2.4546	-0.950097	-0.537949	-6.21956	8.28508	-7.56268	-14.607	10.6756	0.745729	-12.4171	0.37488	-5.04494	-1.1175
	-0.823593	4.98957	-0.726802	0.00986476	0.340255	-0.480638	-0.09937	0.0892522	-0.0668311	-0.0933768	0.00661113	0.0046827	0.0115875	-0.00222689	-0.00141724	6.8227	5.50965	-2.34903	1.65769	-6.7716	-7.40025	-9.61677	-6.39669	-5.71488	6.05925	-1.89112	18.7949	-2.62319	2.13183	1.2938
	0.690101	-0.950837	0.157521	-0.258154	-0.158268	-0.261679	0.160117	0.0721456	-0.0238547	0.0459648	0.00319894	-0.00281972	-0.00252486	-0.00167986	8.63386e-05	-5.67744	6.84635	-2.40272	2.23851	-6.68964	2.76509	3.4169	-1.00701	-4.35578	-7.39021	-1.76194	0.846636	3.73483	0.183223	2.54203
	-2.13657	-3.81201	-0.0953581	0.0231447	-0.0723758	-0.301225	-0.135443	0.0919009	0.00681416	0.0368161	-0.0131217	-0.00818994	-0.0135368	-0.00334073	-0.00162058	8.49574	-1.58587	0.44659	-3.8506	3.07484	2.9319	6.51462	-3.90853	2.46185	2.08117	6.01679	3.67668	19.1077	11.4961	5.96862
	3.08134	2.43588	-0.863031	-0.566846	-0.127913	-0.456747	-0.0576803	0.127219	-0.063198	-0.0160408	0.0186561	0.00684172	0.00332331	0.00132012	-0.00135185	-5.67744	6.84635	-2.40272	2.23851	-6.68964	2.76509	3.4169	-1.00701	-4.35578	-7.39021	-1.76194	0.846636	3.73483	0.183223	2.54203
	-3.6236	7.29064	0.492447	0.822289	0.635151	-0.688344	0.0973763	-0.037048	0.214805	0.0276221	0.0196804	-0.000508777	0.00430696	0.000517624	-0.00315375	-3.03685	8.41145	-0.34972	-3.59737	14.4527	-9.00793	-5.22863	3.36043	-6.38865	-9.38955	14.2974	1.58508	0.0328074	-0.602454	0.724963
	0.0750439	-1.99474	-0.369724	-0.21431	-0.0557782	-0.247358	0.107933	0.0738361	-0.00464569	0.0500415	-0.0020135	-0.00464637	-0.00336391	-0.00167997	0.000465996	8.07323	-1.31008	0.141122	22.9094	8.06664	7.88433	-1.84878	0.566957	-5.35079	-2.66476	0.125957	-0.04497	0.0642343	0.0802604	-0.0330158
	-2.44202	-3.09605	0.690718	-0.0347253	-0.19359	0.149965	-0.162075	0.106914	-0.010299	0.00328628	0.0199226	0.0201652	0.00540806	-0.00409842	-0.00232444
	2.68909	-0.773863	-0.512724	-0.526324	0.0473526	0.15826	0.142609	0.0762382	0.0936248	-0.0290788	0.00378822	0.00290481	-0.000215597	-0.00156222	0.000334932
	0.288027	-4.18469	0.762981	-0.0328431	0.336437	-0.0307376	-0.0548984	0.0817145	0.03544	-0.0113198	-0.0109373	0.0111764	0.00130741	0.00225734	0.000714969
	9.91385	1.42587	0.173143	0.567121	-0.331336	0.267332	-0.00443073	0.0731062	0.124013	-0.124909	-0.0182715	-0.0232791	0.000507652	-0.00488754	-0.00244971
	0.0515812	3.53535	2.2128	-0.238467	-0.198925	0.25891	0.0531491	0.125526	-0.0520812	0.0143	0.00956034	-0.00456338	-0.00510082	0.00122534	-0.00167658
	-1.35941	2.46096	0.202188	-0.104836	-0.0561066	0.40139	0.0297556	0.109964	-0.0118193	0.0332233	0.000129556	0.000789887	-0.00100244	-2.4623e-05	-0.00178714
	-1.58949	-1.88986	-0.0907938	-0.171975	-0.120009	0.273308	-0.0254905	0.095028	0.00139981	-0.000814971	0.0149524	0.016569	0.00797995	-0.00180133	-0.000947175
	-3.29401	2.71658	-0.696986	0.278003	-0.0183991	0.517495	0.0373259	0.0793699	0.0715853	0.107943	0.00531519	0.00330248	-0.00256931	0.00156904	-0.00229732
	-1.83281	4.20128	-0.67261	-0.0027878	0.270401	0.372986	-0.0679464	0.125305	0.0327849	0.0703517	-0.0136197	-0.00728401	-0.00197478	-0.00113026	0.00159169
	4.41136	-2.6209	0.422081	0.574366	0.496724	0.295648	0.204882	0.0477621	-0.0226685	-0.100525	0.0114219	0.00259968	0.0034413	-0.000751637	0.00289497
	0.441687	-4.87175	0.893477	0.28977	0.568677	-0.0409851	-0.133653	0.0893918	-0.0102466	-0.0347837	-0.023053	0.0084431	-0.00241955	0.00457178	-0.000365879
	-2.37878	1.62886	-0.470949	0.0422469	-0.0949883	0.481629	0.0298153	0.0944087	0.0116264	0.0495198	0.00643415	0.00642981	0.00130628	0.000109147	-0.00246668
	0.770095	-0.672265	-0.17774	-0.438364	-0.0242582	0.232441	0.0971413	0.0883654	0.0353931	-0.016226	0.00513037	0.00726672	0.00262664	-0.000695548	-0.000438804
	-1.26813	-4.16523	0.222948	-0.14217	0.153699	-0.00551274	-0.181394	0.103142	0.0310687	-0.00210485	-0.0085422	0.0150818	0.00195757	-0.00153385	-0.00121506
	-0.921851	3.8467	-0.732123	-0.196862	0.241147	0.339395	-0.091374	0.140335	0.000926018	0.0263348	-0.0121112	-0.00733413	-0.00153811	-0.000677977	0.00105638
	1.76501	-3.35603	0.445648	-0.0584989	0.337298	0.0661313	0.0999725	0.0620469	0.0524174	-0.0260467	0.000514842	0.00919224	0.00365995	0.00143047	0.00255397
	-0.32647	-4.75428	0.31049	-0.0159962	0.411922	-0.0721884	-0.170579	0.0956501	0.0356008	-0.0116722	-0.0225623	0.0110311	-0.00123775	0.00168457	-0.000670759
	4.17902	3.80297	-0.336643	-0.826269	-0.0587688	0.0131728	-0.207505	0.175219	0.0454548	-0.0839997	0.0126566	-0.0153012	-0.00666164	0.00664394	-0.000533934
	-0.089598	5.91192	1.27968	-0.225555	0.253239	0.143551	-0.175068	0.176601	-0.0415827	0.0199059	0.00440236	-0.0147028	-0.00178172	-0.000141385	0.00501586
	2.8782	-1.61989	0.716847	-0.305942	0.0553099	0.106938	0.209695	0.0565052	0.0839268	-0.0205609	0.0107426	0.00526848	0.000740881	-0.00129881	0.00150997
	-3.78956	-3.10543	0.27037	0.229024	-0.361869	0.0410631	-0.291716	-0.0603574	-0.00173575	-0.023166	0.0169948	-0.0306316	0.0159681	-0.000846315	-0.000242169
	3.06405	-2.16653	-0.784512	-0.235875	0.26824	0.00347232	0.107774	-0.218144	0.0522087	0.0343291	0.0114001	-0.00508164	-0.00101688	-0.00097447	0.00109952
	-0.523563	-2.65425	0.622452	-0.183791	0.00198415	-0.0362497	-0.0113389	-0.142844	0.000638107	0.0244299	0.00350354	-0.00763665	0.00364669	0.0011553	0.000377165
	10.0424	1.59376	0.101427	0.631634	-0.379096	0.105408	-0.144238	-0.314724	0.0144491	0.0126008	-0.00699019	0.015624	-0.00851537	-0.00232424	-0.00138286
	-0.921709	2.55832	2.08856	-0.0373146	-0.235437	0.0756005	0.0906947	-0.167291	-0.0885308	-0.00508208	0.00247769	0.00245135	-0.00320307	0.000798546	-0.00161922
	-1.93868	1.58906	-0.142942	0.0299119	-0.0656952	0.184257	0.0351597	-0.159489	-0.0365183	-0.0103014	-0.0107442	0.00145849	0.00107273	0.000717005	-0.000661408
	-3.37811	-1.39038	-0.49002	0.189566	-0.272698	0.210227	-0.0735796	-0.12204	-0.0113277	-0.0159823	0.010531	0.0007646	0.0075952	0.000350493	0.000958371
	-0.950899	0.61226	-0.871484	-0.203072	0.0168093	0.156406	0.00662824	-0.156347	-0.0369964	-0.023011	-0.0111975	0.00086136	0.00245091	-6.19892e-05	-0.000241843
	-2.4522	3.17753	-0.274157	0.186172	0.0980921	0.149686	0.0191706	-0.167597	-0.00297082	0.00876988	-0.0169959	0.00230822	-0.00214593	0.00060583	-0.000579956
	1.77532	-0.726268	-0.0587623	-0.430717	0.00708443	-0.00052817	0.0921893	-0.19491	0.0120548	0.0162145	0.0076968	-0.00128075	-0.00161536	-0.000332995	-2.73961e-05
	-0.163941	-3.71064	0.512106	-0.118151	0.203824	-0.117224	-0.0697354	-0.135682	0.0202664	0.0385958	-0.00169428	-0.012554	0.000664107	0.00253143	-0.000550094
	-2.33096	0.931033	-0.450193	0.0729131	-0.0996051	0.217097	0.0292255	-0.15573	-0.0242428	-0.00984601	-0.0089734	0.00106675	0.00299281	0.0010627	-0.000298401
	-0.387788	-0.532691	-0.335882	-0.273412	-0.0331268	0.100228	0.0351201	-0.160157	-0.0256784	-0.00807774	-0.00285659	-0.00125777	0.00329182	7.9188e-05	0.000187311
	-1.74966	-2.322	-0.0921973	-0.100035	-0.0836096	0.0613296	-0.0674654	-0.124595	-0.0133486	-0.000391105	0.000950322	-0.00449785	0.00660718	-8.93484e-05	0.000773416
	-1.01654	4.33606	-0.688513	-0.101456	0.366594	0.00214758	-0.13164	-0.145057	-0.0532715	-0.0324052	-0.0120659	0.00670535	-0.00187107	-0.00202767	0.001047
	1.00883	-2.17783	0.323793	-0.284564	0.081864	-0.0322226	0.0753736	-0.178498	0.0198143	0.0322926	0.00801006	-0.00640281	0.00160013	0.000903533	0.000676824
	-1.35538	-4.30232	0.124851	-0.0821818	0.188652	-0.148918	-0.218882	-0.0968347	0.0209661	0.0285325	-0.0124802	-0.0138639	-0.00157575	0.000761106	-0.00207428
	3.44075	3.01795	-0.558575	-0.703534	0.00951944	-0.151008	-0.178665	-0.17474	-0.0425508	-0.0505371	0.0174569	0.0134281	-0.00976056	0.00303391	-0.00129665
	-1.94226	6.50855	0.924365	0.221543	0.525987	-0.166265	-0.125144	-0.153021	-0.007632	0.0208646	0.00120519	0.00797268	-0.00186396	-0.00482092	0.00427668
	1.36164	-1.90225	0.217138	-0.317471	0.0758555	-0.0247622	0.0918518	-0.186899	0.0226004	0.0313759	0.00899521	-0.00535427	0.000821141	0.000492116	0.000643414

## Sheet: AHC1_HID4
4.34375	3.94512	1	0					1.9375	3.94512	1	0
1.5	3.94512	2	0					1	3.94512	2	0
1.5	0.161919	3	0					1	0	3	0
1	0.161919	4	0					1	3.94512	4	0
1	0	5	0					2.875	3.94512	5	0
1	0.161919	6	0					2.875	2.95166
2	0.161919	7	0					2	2.95166
2	0	8	0					2	0
2	0.161919	9	0					2	2.95166
1.5	0.161919	10	0					3.75	2.95166
1.5	3.94512	11	0					3.75	2.13225
7.1875	3.94512	12	0					3	2.13225
7.1875	2.95166	13	0					3	0
3.5	2.95166	14	0					3	2.13225
3.5	0.154821	15	0					4.5	2.13225
3	0.154821	16	0					4.5	0.610208
3	0	17	0					4	0.610208
3	0.154821	18	0					4	0
4	0.154821	19	0					4	0.610208
4	0	20	0					5	0.610208
4	0.154821							5	0
3.5	0.154821							5	0.610208
3.5	2.95166							4.5	0.610208
10.875	2.95166							4.5	2.13225
10.875	2.13225							3.75	2.13225
6.3125	2.13225							3.75	2.95166
6.3125	0.258241							2.875	2.95166
5	0.258241							2.875	3.94512
5	0							1.9375	3.94512
5	0.258241
7.625	0.258241
7.625	0.0752908
6.5	0.0752908
6.5	0.00710293
6	0.00710293
6	0
6	0.00710293
7	0.00710293
7	0
7	0.00710293
6.5	0.00710293
6.5	0.0752908
8.75	0.0752908
8.75	0.0356667
8	0.0356667
8	0
8	0.0356667
9.5	0.0356667
9.5	0.00899756
9	0.00899756
9	0
9	0.00899756
10	0.00899756
10	0
10	0.00899756
9.5	0.00899756
9.5	0.0356667
8.75	0.0356667
8.75	0.0752908
7.625	0.0752908
7.625	0.258241
6.3125	0.258241
6.3125	2.13225
15.4375	2.13225
15.4375	0.610208
13	0.610208
13	0.103191
11.5	0.103191
11.5	0.00743458
11	0.00743458
11	0
11	0.00743458
12	0.00743458
12	0
12	0.00743458
11.5	0.00743458
11.5	0.103191
14.5	0.103191
14.5	0.0313172
13.5	0.0313172
13.5	0.0058052
13	0.0058052
13	0
13	0.0058052
14	0.0058052
14	0
14	0.0058052
13.5	0.0058052
13.5	0.0313172
15.5	0.0313172
15.5	0.00671493
15	0.00671493
15	0
15	0.00671493
16	0.00671493
16	0
16	0.00671493
15.5	0.00671493
15.5	0.0313172
14.5	0.0313172
14.5	0.103191
13	0.103191
13	0.610208
17.875	0.610208
17.875	0.256822
17	0.256822
17	0
17	0.256822
18.75	0.256822
18.75	0.0828756
18	0.0828756
18	0
18	0.0828756
19.5	0.0828756
19.5	0.0301652
19	0.0301652
19	0
19	0.0301652
20	0.0301652
20	0
20	0.0301652
19.5	0.0301652
19.5	0.0828756
18.75	0.0828756
18.75	0.256822
17.875	0.256822
17.875	0.610208
15.4375	0.610208
15.4375	2.13225
10.875	2.13225
10.875	2.95166
7.1875	2.95166
7.1875	3.94512
4.34375	3.94512

[truncated: 18 more sheets: AHC1_HID5, DA1_HID2, AHC2_HID4, AHC2_HID5, AHC_HID, AHC_HID1, AHC1_HID, AHC1_HID1, AHC2_HID, AHC2_HID1, AHC1_HID2, AHC1_HID3, DA1_HID, AHC2_HID2, AHC2_HID3, DA1_HID1, DA2_HID, DA2_HID1]
